# Supplementary material
Source: PubMed Central journal article supplement (PMC4359976)

**Figure S6-1:** LD plots for all LGs from the two hybridizing oak species targeted in this study. Significant inter-allelic associations after Yates correction are indicated by red ( $D' > 0$ ) and blue ( $D' < 0$ ) dots within the small squares; their sizes being proportional to the  $D'$  value. Shades of yellow to white in the large squares indicate physical distances between loci (dark yellow < 100 kb; white > 20 Mb).

*A – Quercus faginea*

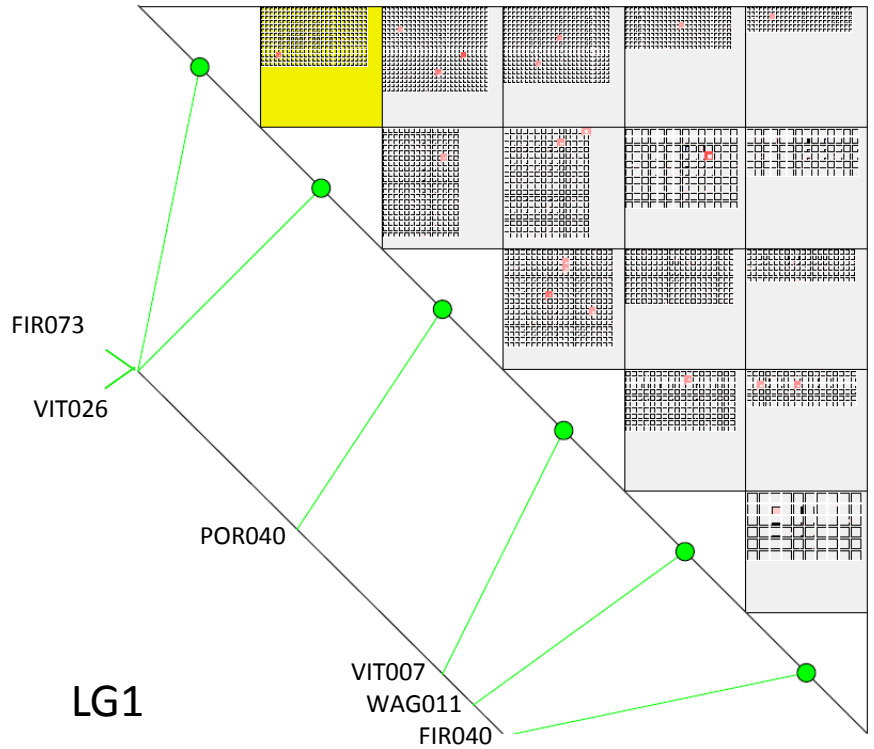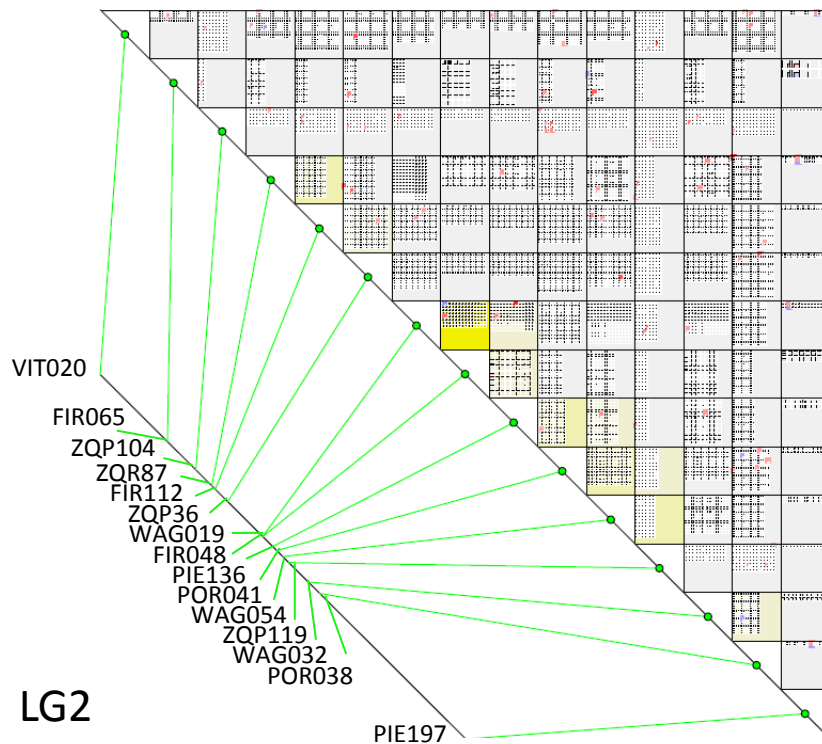

Figure S8-1: (cont.)

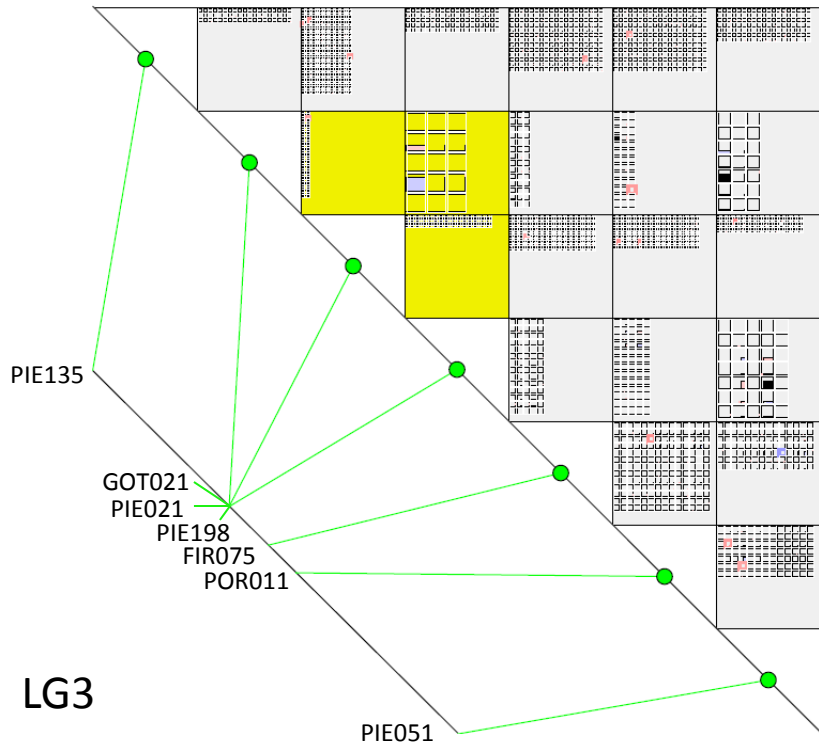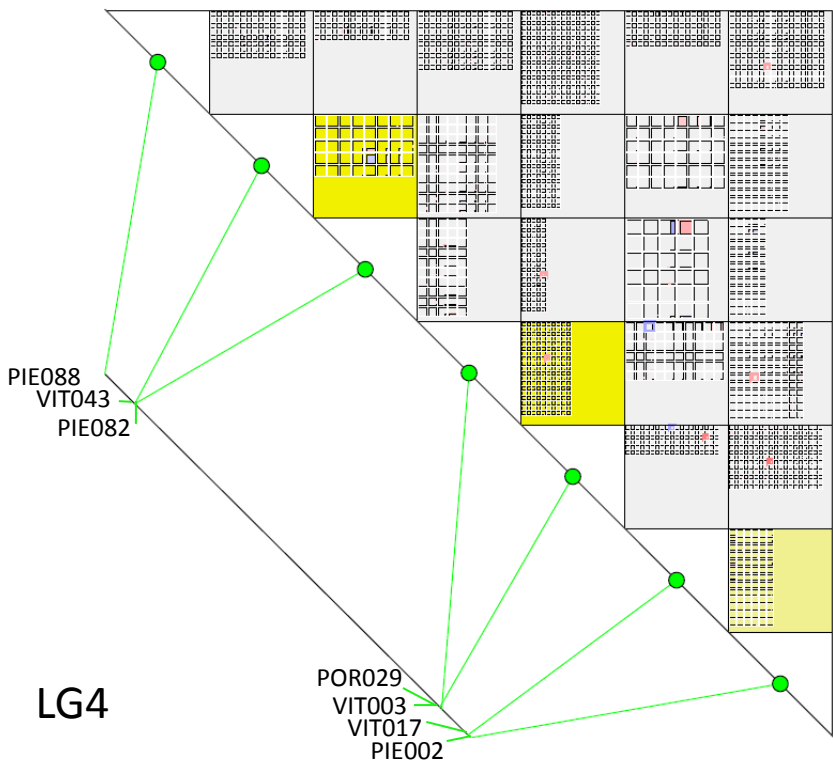

Figure S6-1: (cont.)

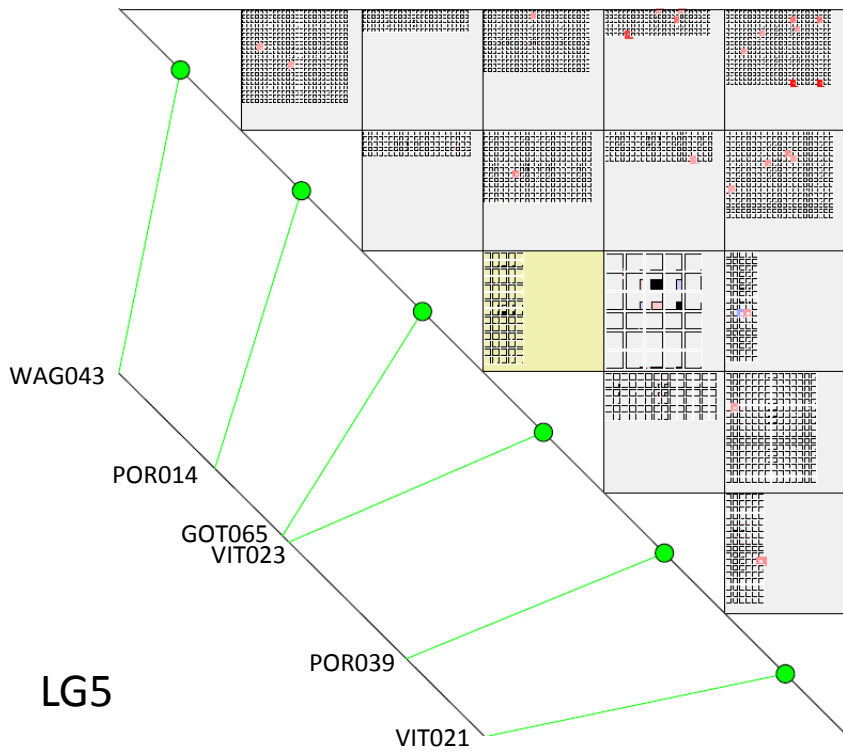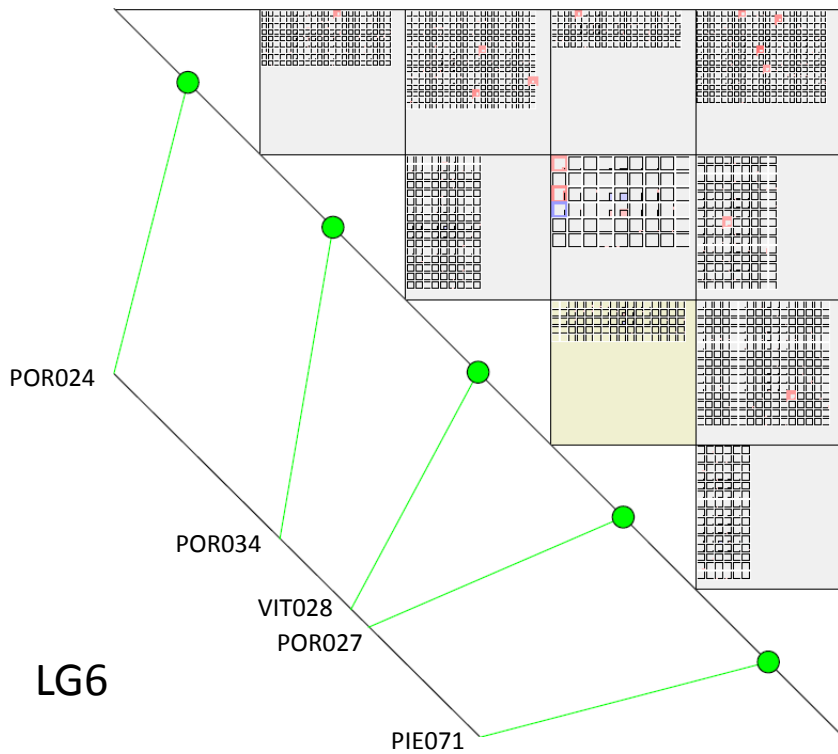

Figure S6-1: (cont.)

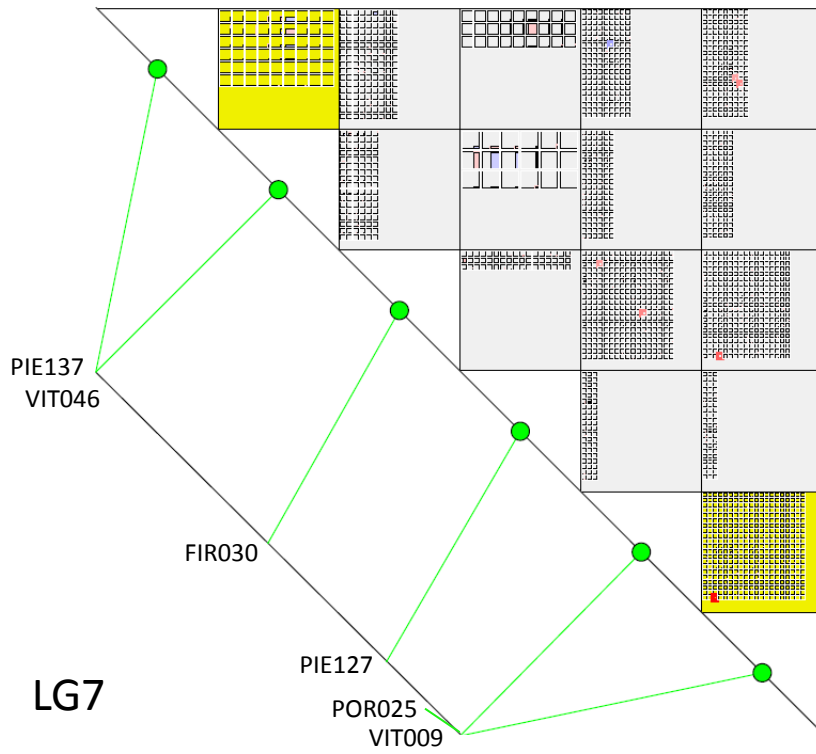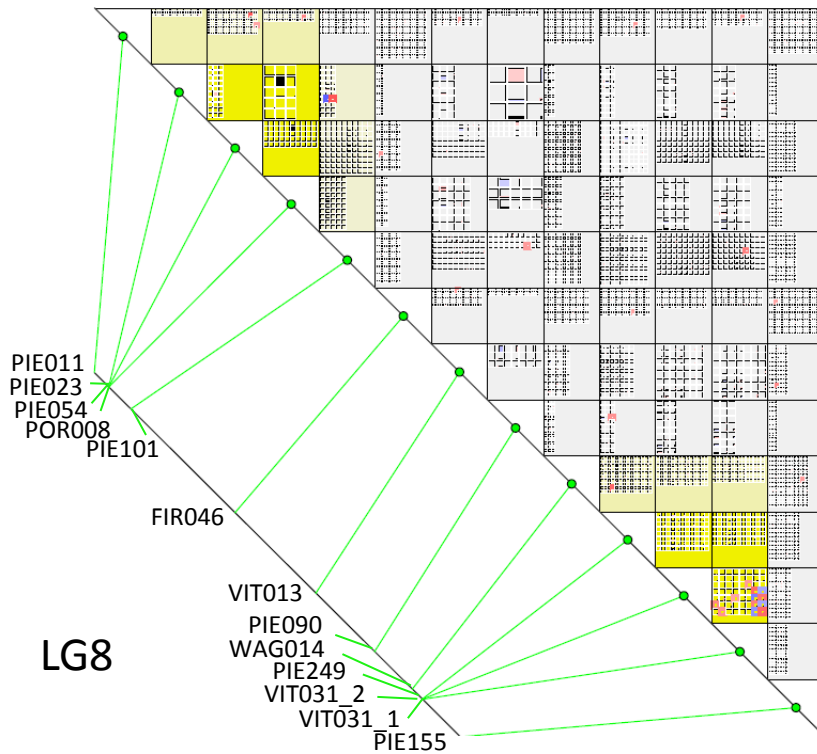

Figure S6-1: (cont.)

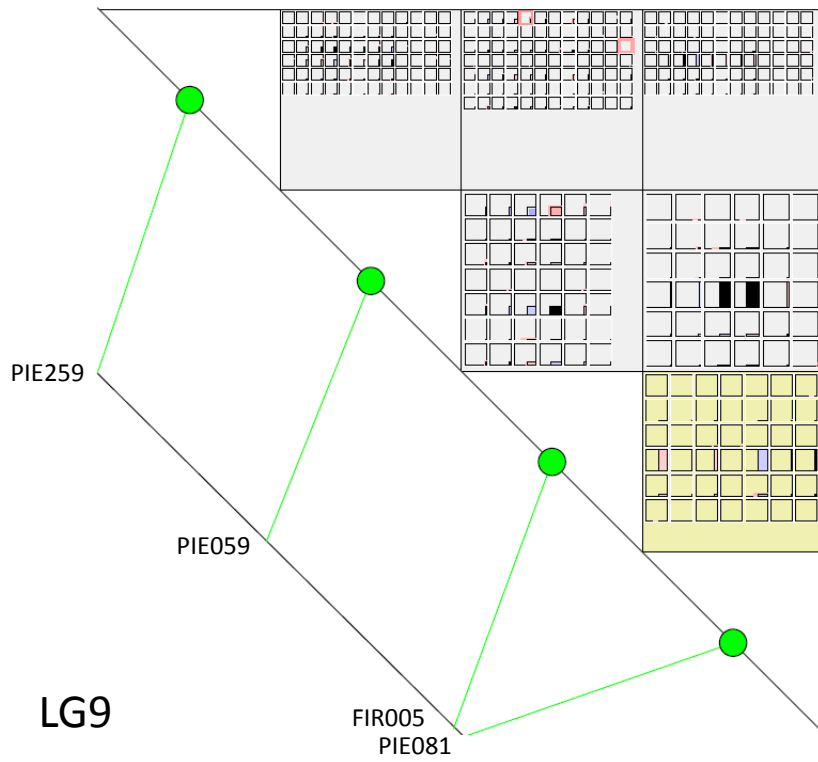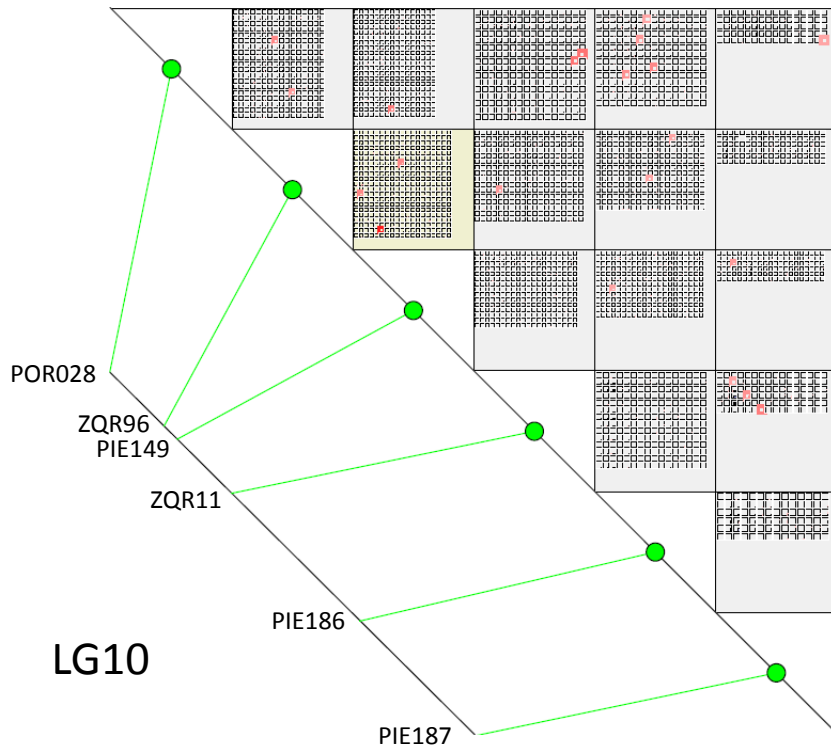

Figure S6-1: (cont.)

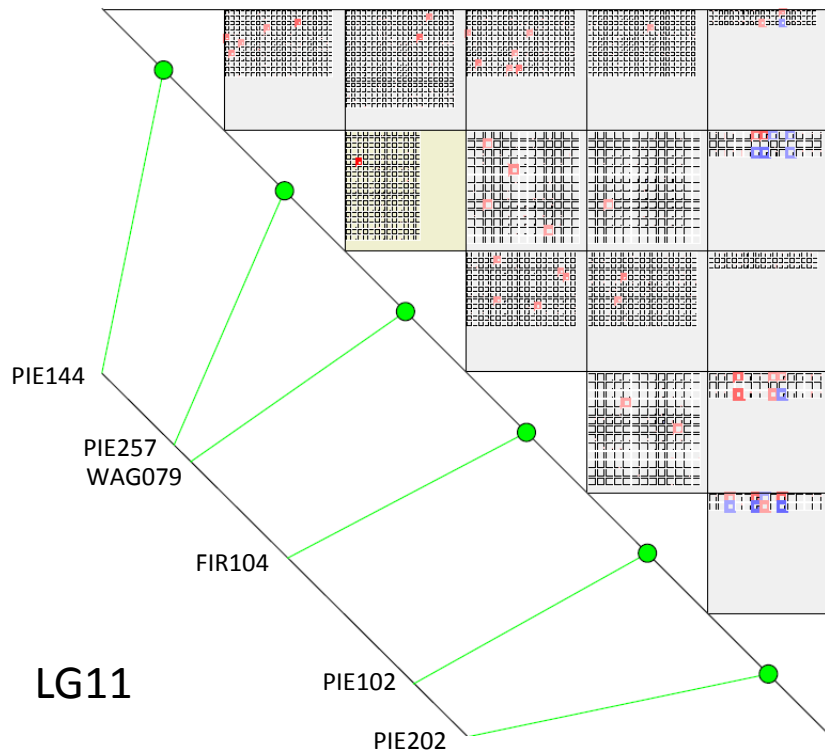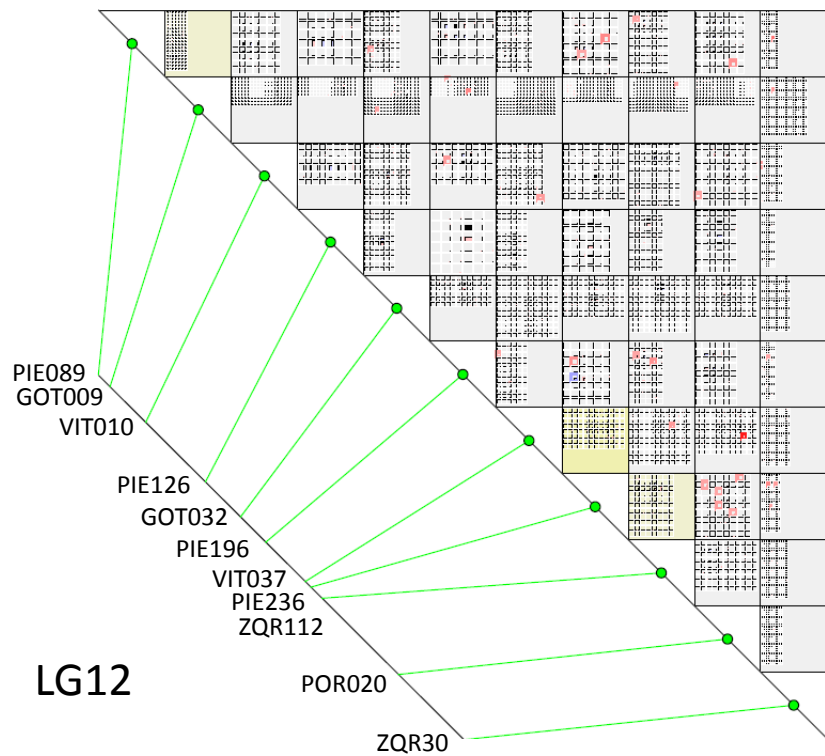

Figure S6-1: (cont.)

B – *Quercus pyrenaica*

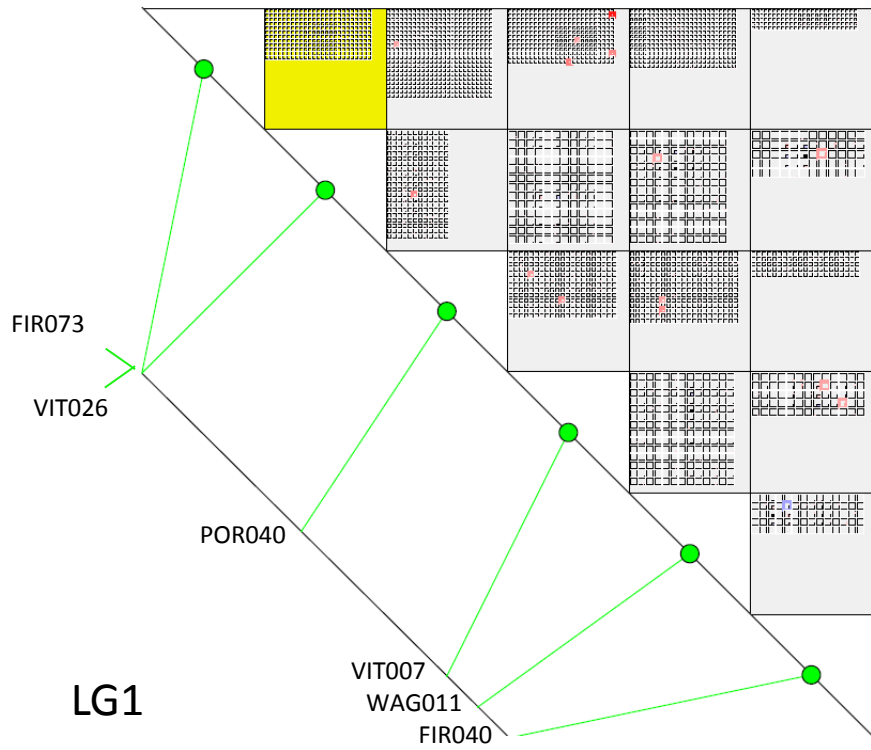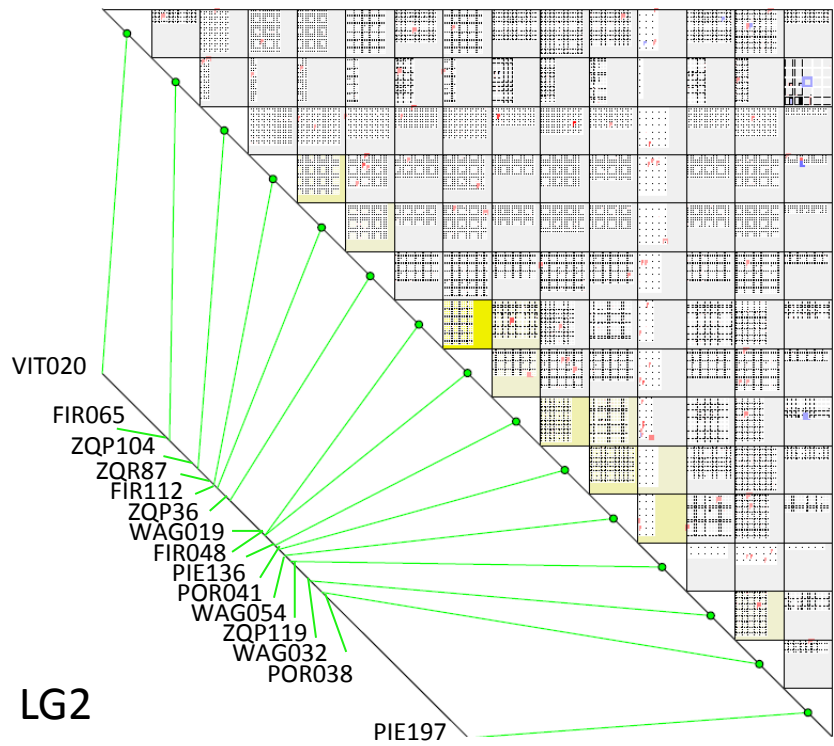

Figure S6-1: (cont.)

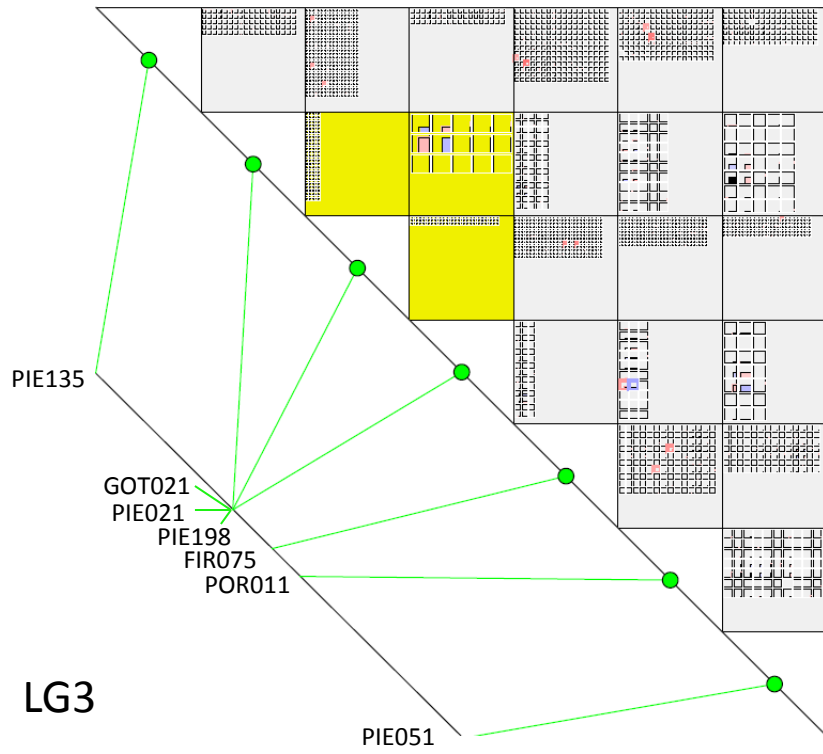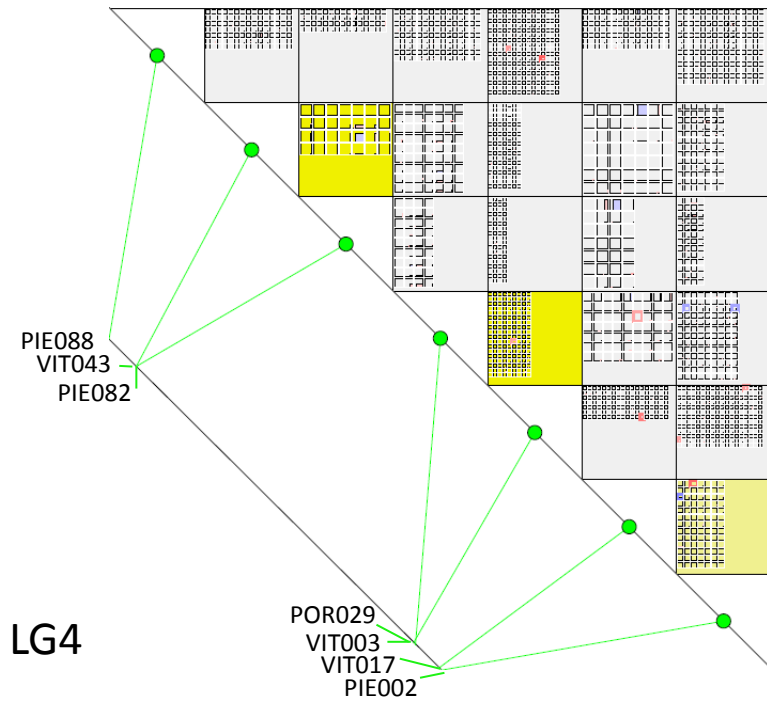



Figure S6-1: (cont.)

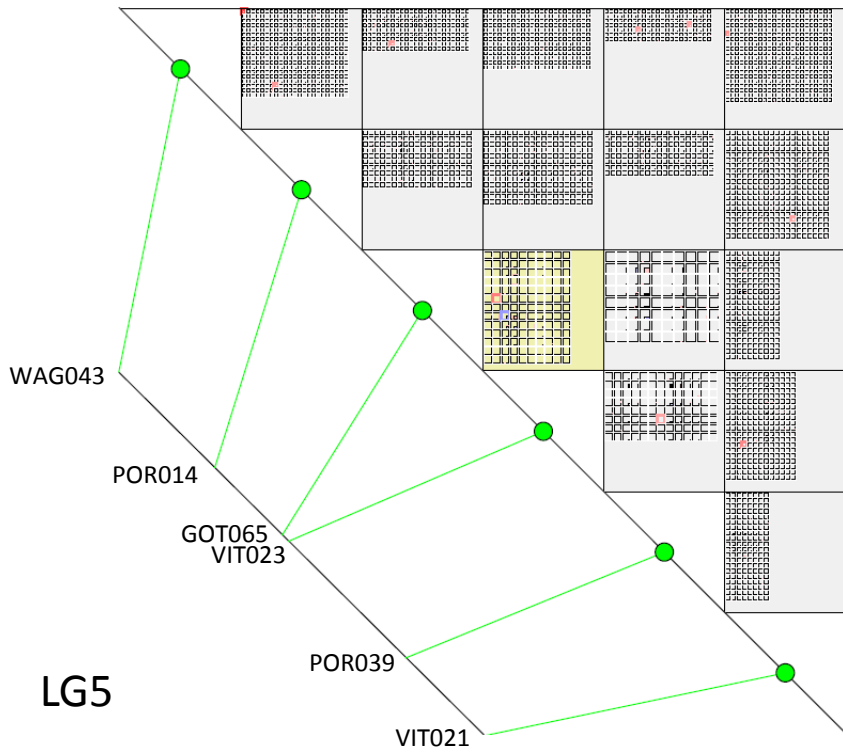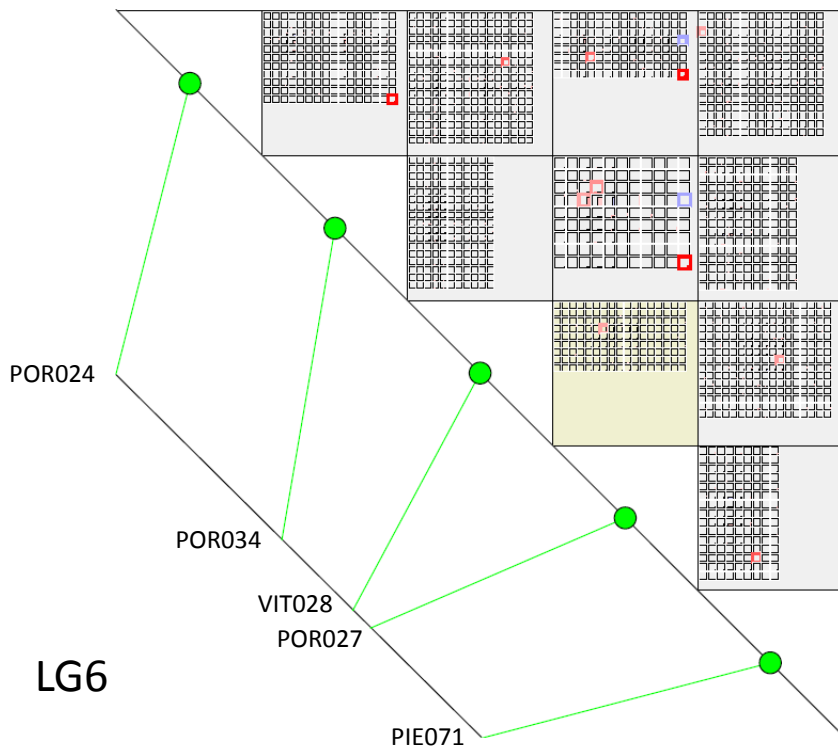

Figure S6-1: (cont.)

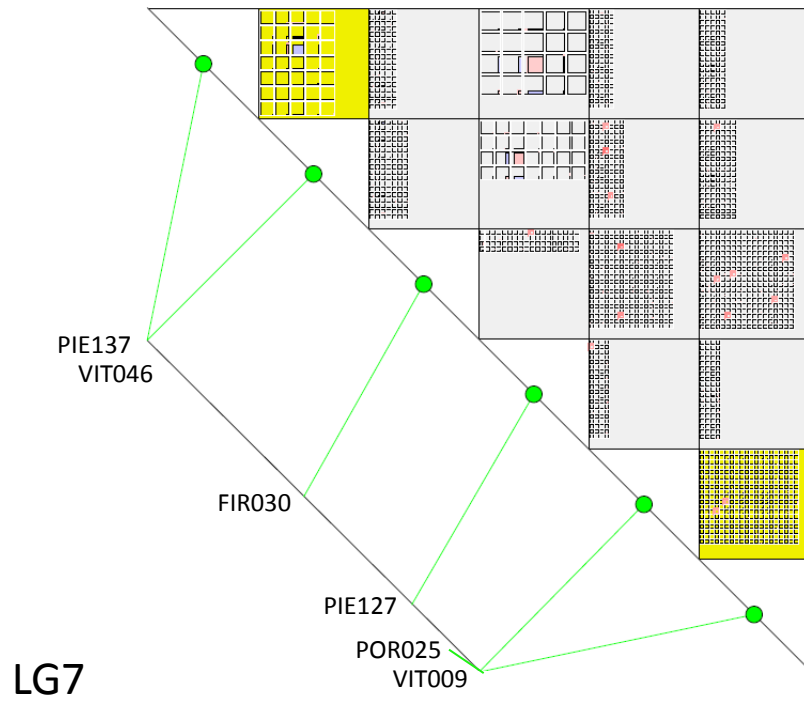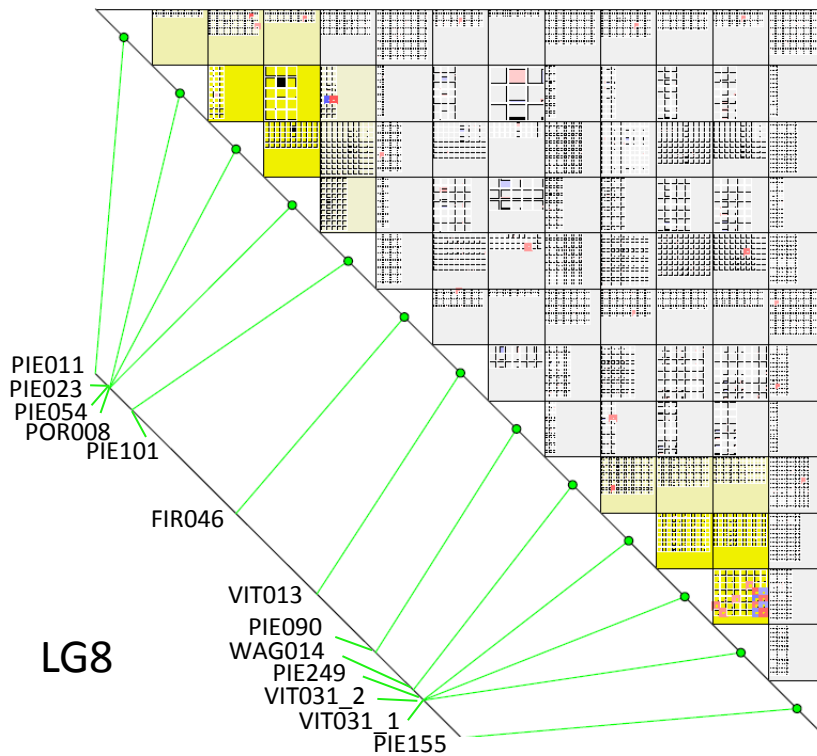

Figure S6-1: (cont.)

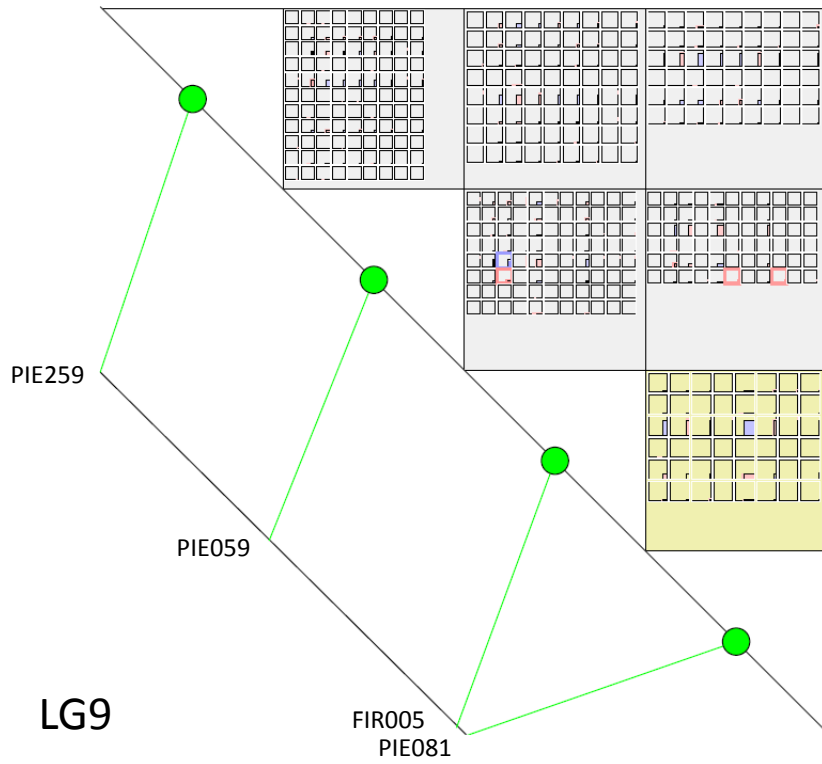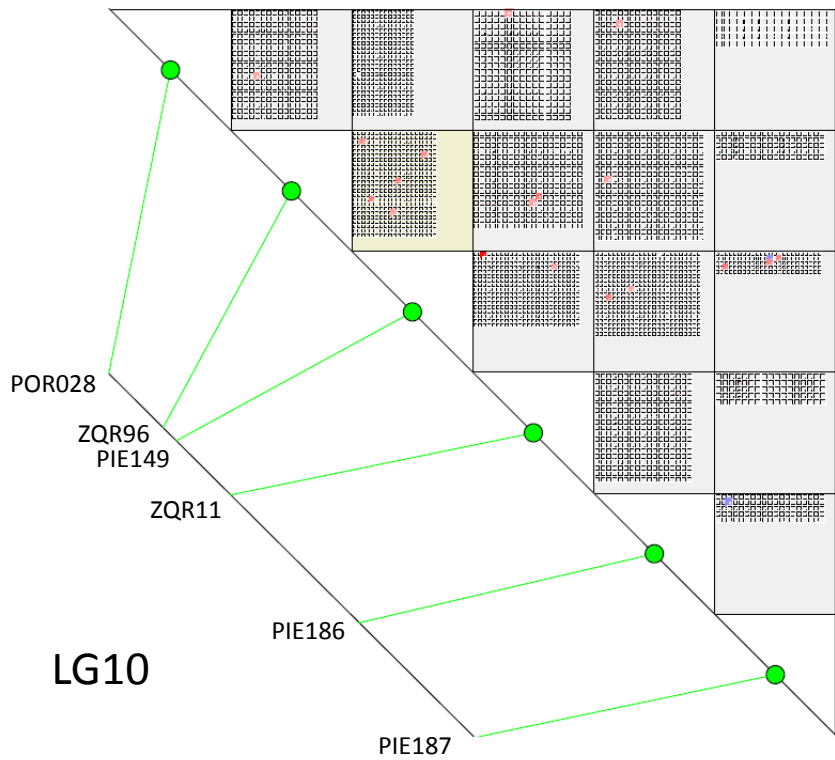

Figure S6-1: (cont.)

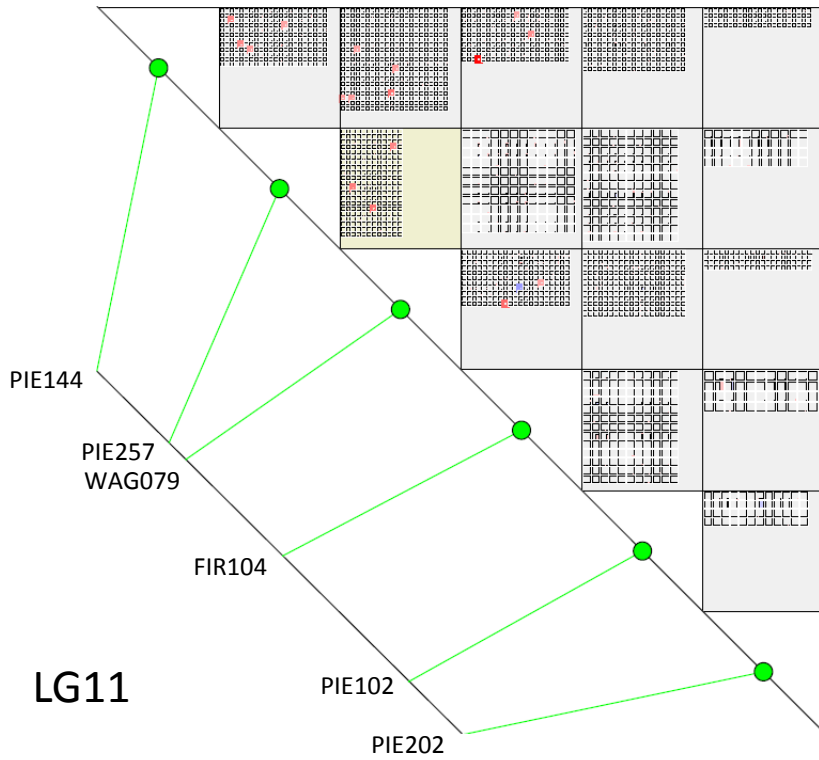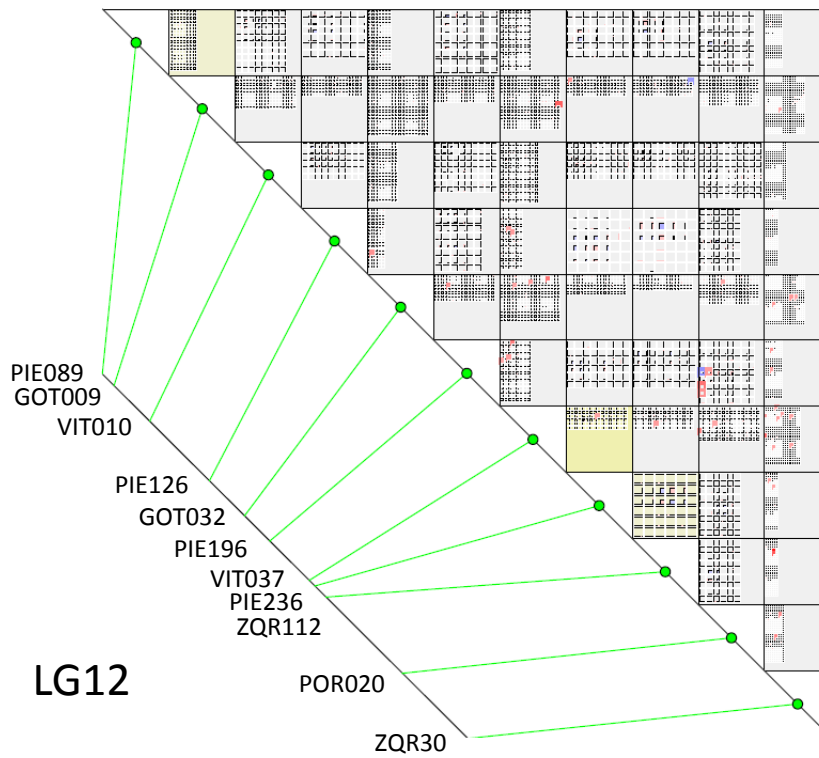

**Figure S6-2::** LD plots for all LGs from the two hybridizing oak species targeted in this study. Significant inter-allelic associations without Yates correction are indicated by red ( $D' > 0$ ) and blue ( $D' < 0$ ) dots within the small squares; their sizes being proportional to the  $D'$  value. Shades of yellow to white in the large squares indicate physical distances between loci (dark yellow  $< 100$  kb; white  $> 20$  Mb).

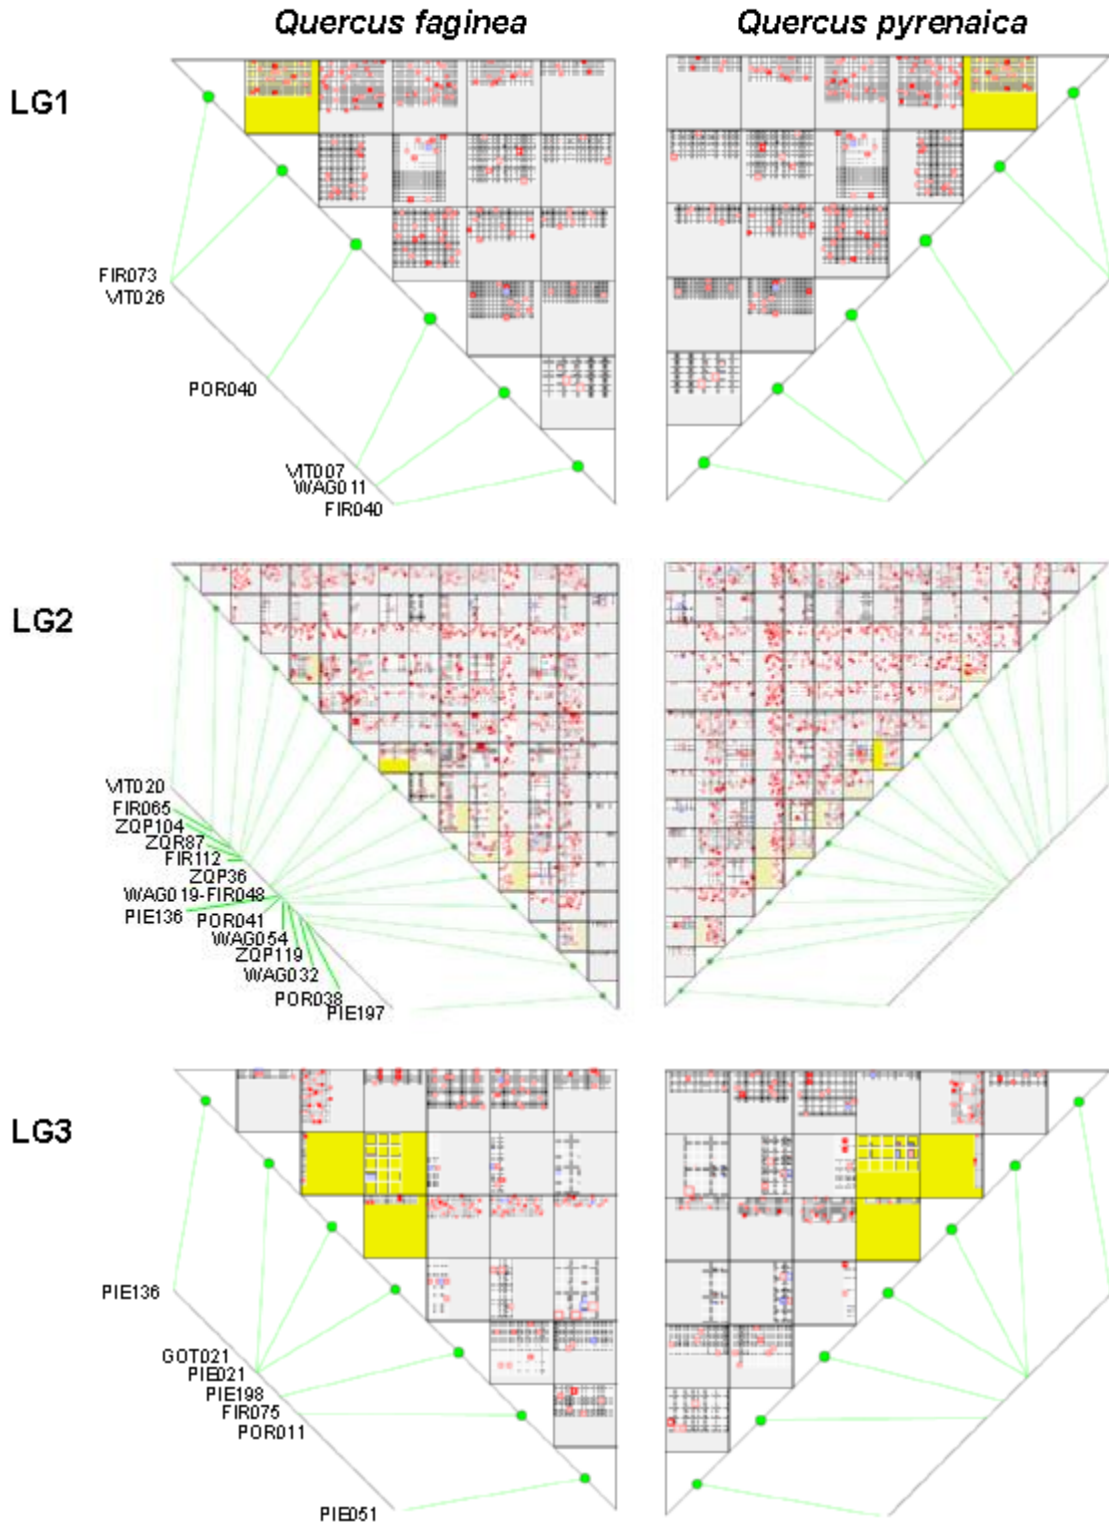

Figure S6-2: (cont.)

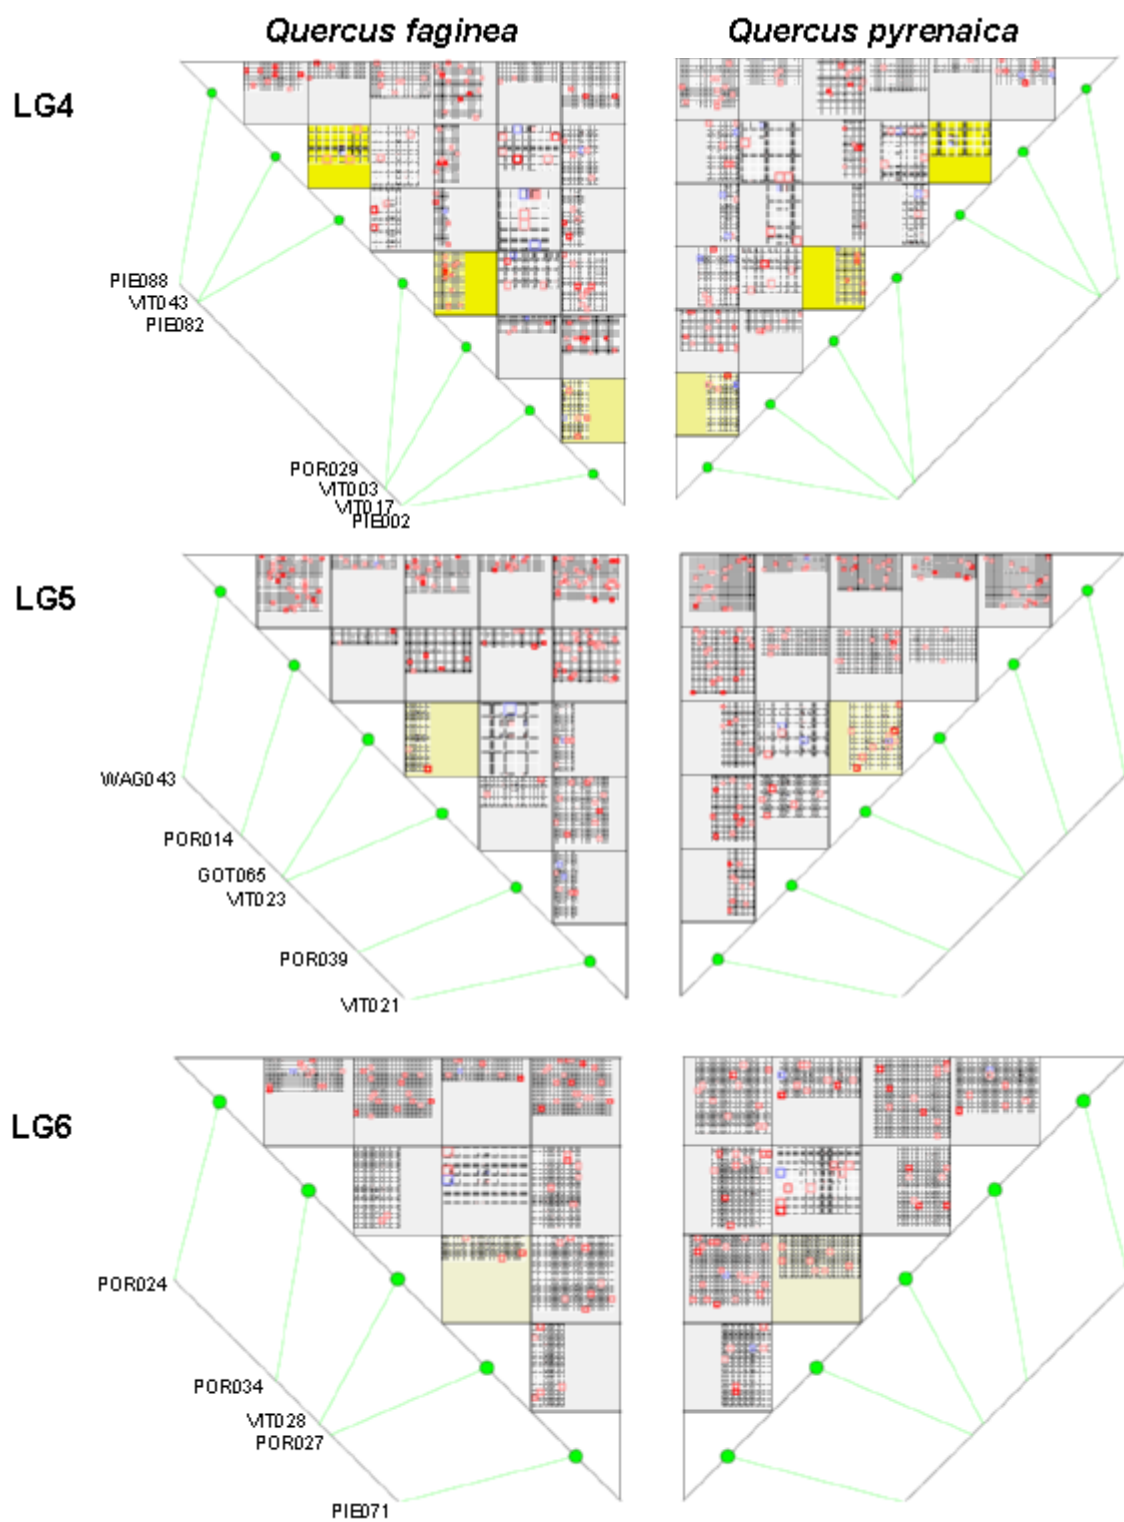

Figure S6-2: (cont.)

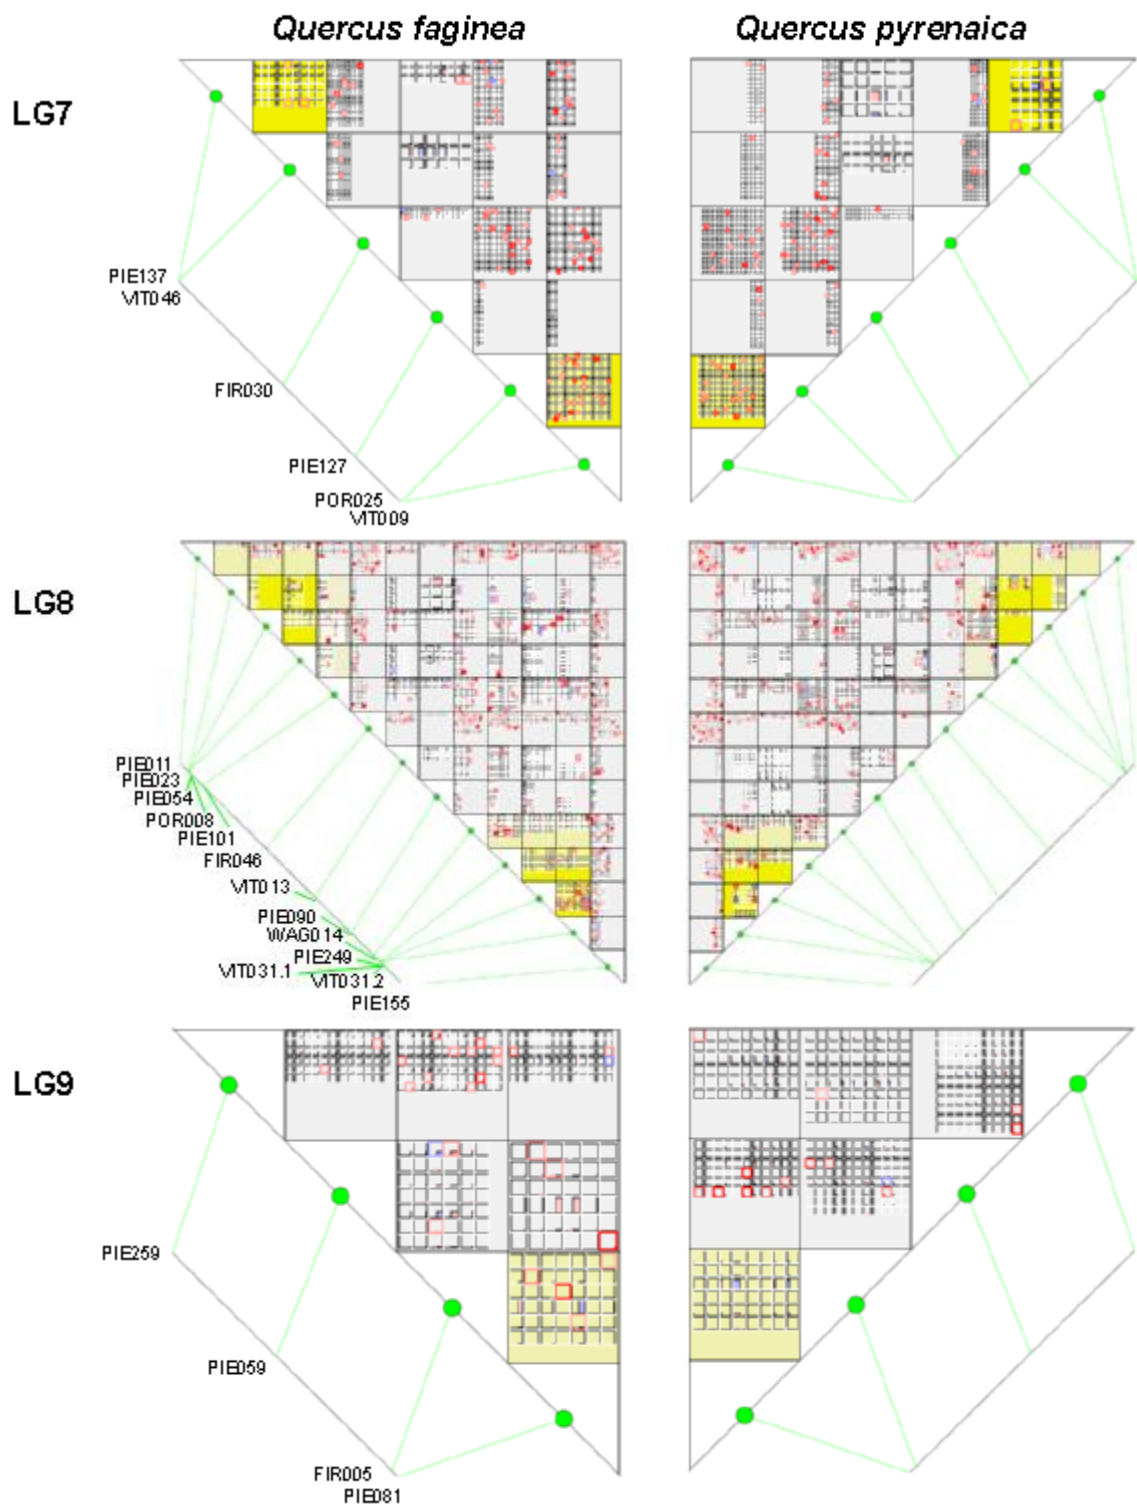

Figure S6-2: (cont.)

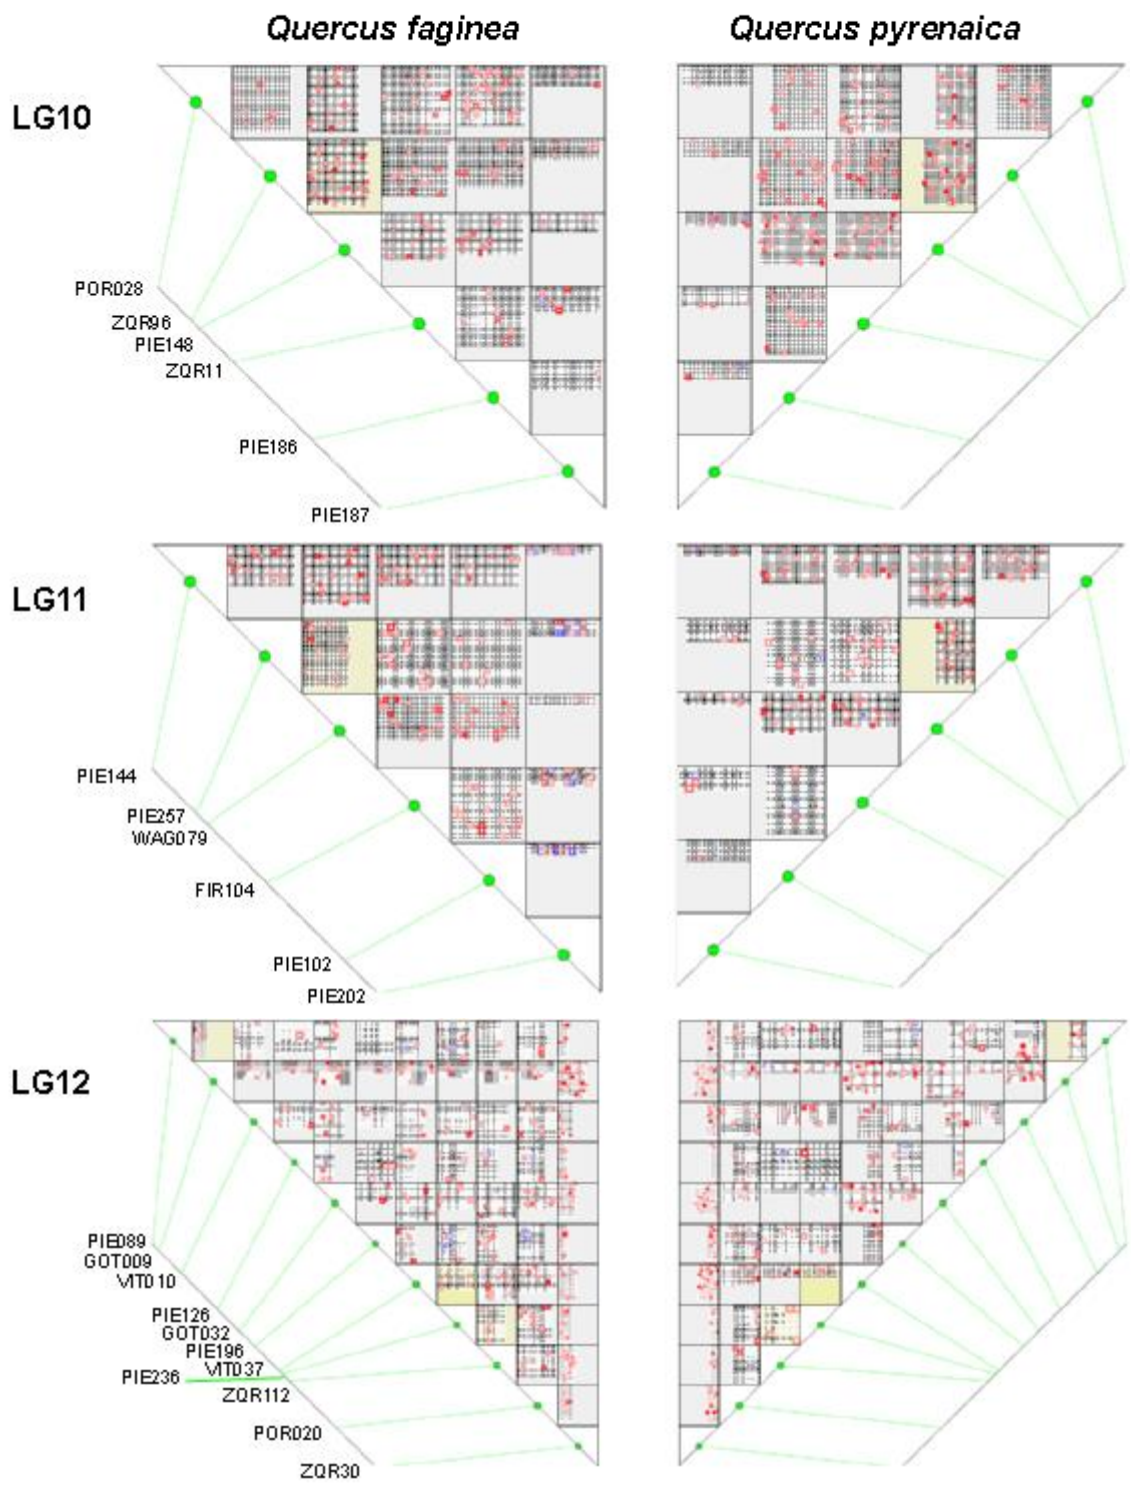

Supplement: hdy2014113x6.pdf [file hdy2014113x6.pdf]
