# Supplementary material
Source: PubMed Central journal article supplement (PMC4359976)
Supplement: hdy2014113x1.pdf [file hdy2014113x1.pdf]

**Table S1:** Characterization of the sampling localities according to the geographical coordinates, the species sampled and the forest types.

| Stand (name)                | Latitude/Longitude | Species                                  | Samples | Forest type                                             |
|-----------------------------|--------------------|------------------------------------------|---------|---------------------------------------------------------|
| Ancares                     | 42.824/-6.956      | <i>Q. pyrenaica</i>                      | 12      | Mono-specific                                           |
| Cabañeros National Park     | 39.336/-4.502      | <i>Q. faginea</i><br><i>Q. pyrenaica</i> | 24      | Mixed Forest                                            |
| Fermoselle                  | 41.299/-6.423      | <i>Q. faginea</i>                        | 12      | Isolated trees                                          |
| Font-Roja Park              | 38.758/-0.622      | <i>Q. faginea</i>                        | 12      | Mixed Forest<br>( <i>Q. ilex</i> )                      |
| Izki Park                   | 42.692/-2.419      | <i>Q. faginea</i>                        | 12      | Mono-specific                                           |
|                             | 42.673/-2.503      | <i>Q. pyrenaica</i>                      | 12      | Mono-specific                                           |
| Liébana                     | 43.090/-4.635      | <i>Q. pyrenaica</i>                      | 12      | Mono-specific                                           |
| Monasterio de La Sierra     | 42.048/-3.186      | <i>Q. pyrenaica</i>                      | 12      | Mixed-Forest<br>( <i>Q. petraea</i> )                   |
| Montejo de La Sierra Park   | 41.106/-3.495      | <i>Q. pyrenaica</i>                      | 12      | Mixed-Forest<br>( <i>Q. petraea</i> )                   |
| Rio Lobos Park              | 41.729/-3.040      | <i>Q. faginea</i>                        | 12      | Mixed Forest<br>( <i>Juniperus thurifera</i> )          |
| Serranía Cuenca             | 39.825/-2.007      | <i>Q. faginea</i>                        | 12      | Mixed Forest<br>( <i>Pinus nigra</i> , <i>Q. ilex</i> ) |
| Sierra Nevada National Park | 37.102/-3.452      | <i>Q. faginea</i>                        | 12      | Mixed Forest<br>( <i>Q. ilex</i> )                      |
|                             | 37.100/-3.443      | <i>Q. pyrenaica</i>                      | 12      | Mono-specific                                           |
| Talayuela                   | 39.999/-5.696      | <i>Q. faginea</i><br><i>Q. pyrenaica</i> | 24      | Mixed Forest                                            |
