# Supplementary material
Source: PubMed Central journal article supplement (PMC4359976)
Supplement: hdy2014113x2.pdf [file hdy2014113x2.pdf]

**Table S-2:** Descriptions of the 98 markers used in this study. The second column indicates whether markers belong to the first genotyped set (69 markers) or the second “saturating” set (29 markers in four linkage groups). Next columns indicate the PCR primers and the annealing temperatures. The table also shows the range (base pairs) of the PCR products, the diversity estimates (AR: allelic richness, Ho: Observed heterozygosity, He: Expected heterozygosity, EA: Effective number of alleles), the intra-individual allelic correlations (FIS) and the expected frequencies of null alleles, for

| Locus  | LG | Dataset | Motif | Forward primer              | Reverse primer              | Annealing Temperature |
|--------|----|---------|-------|-----------------------------|-----------------------------|-----------------------|
| FIR073 | 1  | 1st     | TA    | TCGCTGAGAAAAGAAACAAAA       | GAATTTCTGGGAAAGCGTGA        | 59                    |
| VIT026 | 1  | 1st     | CCA   | CCACCTAAACCAAACCCTCA        | TGTTGCCAATACCGATTCT         | 61                    |
| POR040 | 1  | 1st     | GA    | CATCATACGACCCGAAAACC        | TCTTCTGCTCCTCTCCCCTA        | 59                    |
| VIT007 | 1  | 1st     | TC    | ACCCTTTCTCTTCCCAAAG         | GGAAATCGGAAATCGGAAAT        | 60                    |
| WAG011 | 1  | 1st     | CT    | AAAAACCCCATTTACCCCTC        | TTTGAGAACTTTGGCCACC         | 59                    |
| FIR040 | 1  | 1st     | GGA   | GAAACGGAAACGCAAACG          | GAGCAGAGGGCTAAACTCCA        | 59                    |
| VIT020 | 2  | 1st     | CT    | CCAAACACGGCTTACAAAGAA       | CCGCTCGAGGCTTTTCTAGT        | 61                    |
| FIR065 | 2  | 1st     | CTT   | ATTCCCATGCATCAAAATCC        | TCCTTCAGTTTGAGAGCTCCT       | 59                    |
| ZQP104 | 2  | 2nd     | AG    | CACCACTACCGCTGTGAGATAG      | GATGGTACAGTAGCAACATTC       | 59                    |
| ZQR87  | 2  | 1st     | AG    | TCCCACCACTTTGGTCTCTCA       | GTTGTCAGCAGTGGGATGGGTA      | 55.5                  |
| FIR112 | 2  | 2nd     | CT    | TCTCTTCTATAATCCTCTCTCAAGGTC | GCGCCAGAGTGAAACAAAGT        | 59                    |
| ZQP36  | 2  | 2nd     | AG    | GATCAAAATTTGGAATATTAAGAGAG  | ACTGTGGTGGTGAAGTCTAACATGTAG | 59                    |
| WAG019 | 2  | 2nd     | TTC   | ACAGAACACGGAGGAGTTGG        | CTGCAAAATCGGCTTAGCTC        | 59                    |
| FIR048 | 2  | 2nd     | CT    | TGCACCAAAATTGGAGGATG        | TTGATGCAAGGTGCAGTTTC        | 59                    |
| PIE136 | 2  | 2nd     | TG    | TTATCCACTCTGCGGACATG        | ATACACAGCCAGACCCATCC        | 59                    |
| POR041 | 2  | 2nd     | CT    | TGAAACCCAGAGGCAGAGAT        | CCAATTGCCAAAGAAAAGAG        | 59                    |
| WAG054 | 2  | 2nd     | CCA   | AACAGCTCATCCAAGATGCC        | AGGACGAGGCTTCTTGTTCC        | 59                    |
| ZQP119 | 2  | 1st     | AG    | GATCAGTGATAGTGCTCTC         | GATCAACAAGCCCAAGGCAC        | 55.5                  |
| WAG032 | 2  | 2nd     | CT    | GGGACTCTGGAGTTGTGC          | AGGCTGTGTGAGAAGGTTGG        | 59                    |
| POR038 | 2  | 1st     | CT    | GCCTGCTTTTTGTTCCAGAT        | CGAGCTGTTCTTGAAGGTTG        | 59                    |
| PIE197 | 2  | 1st     | CTA   | CAAGTACCACCCACAACC          | GAAAGAGCACTGCCTCCAAC        | 59                    |
| FIR016 | 2  | 2nd     | CTT   | AAATGTGTGCTTGTGTATGCAG      | CCCAACAAATGATAATTAGAAGCA    | 59                    |
| FIR032 | 2  | 2nd     | TA    | TGAAACTGGTCTCAGATTTTGTG     | ACACTACACACTTGCTCTTTTT      | 59                    |

|        |   |     |            |                            |                          |    |
|--------|---|-----|------------|----------------------------|--------------------------|----|
| PIE135 | 3 | 1st | CT         | TTGTCTACCTTTATCAAACATCATTG | CAAATACGAGAATACCACAGCAAC | 59 |
| GOT021 | 3 | 1st | AT         | AGAAAGTTCCAGGGAAAGCA       | CTTCGTCCCCAGTTGAATGT     | 59 |
| PIE021 | 3 | 2nd | TC         | CACCTCTCTTTCTTTCTTTAGCA    | CCCAGATAAGAGAACCCATA     | 59 |
| PIE198 | 3 | 2nd | CAT        | GGTGCTGTGTTGGTAACTGC       | GTTCGAAGCCGAATCCATAC     | 59 |
| FIR075 | 3 | 2nd | GA         | GCAAGCAGCAGACTGTGTGT       | CTCAAACACTACTTGGGAATCG   | 59 |
| POR011 | 3 | 1st | CTT        | ATCCTTCAACGCCCTTTAGC       | GGCAAGCTTAGAAACGGAGA     | 59 |
| PIE051 | 3 | 1st | ACCAAC     | TCAAACCAAAGCCAAAACC        | GCAGCTTCCAAAAGATCACC     | 61 |
| VIT084 | 3 | 2nd | CAG        | AGCCACAACAGTCTCAGCAA       | GTCGGATCCCCCTATTCTGT     | 59 |
| VIT107 | 3 | 2nd | TA         | TGATCACAGATTGGAGCTTAACA    | CCCCACTTAGGAAAGAAGC      | 59 |
| PIE088 | 4 | 1st | TCTTTC     | AGAATGGCCTGTACTTTCCTG      | CATACTGGAGTCCTGGCAGAG    | 58 |
| VIT043 | 4 | 1st | CA         | GATGGGTTGAGCGGACTATC       | CAACCAAATGGAAACATCG      | 59 |
| PIE082 | 4 | 1st | CAGCAA     | GAATTCGATTTTTGATCGAAGC     | GAGCAGAGTCCGGTTGTGAC     | 59 |
| POR029 | 4 | 1st | ACC        | TGGGTTGTGTCTCTCAATGG       | AAGCCTGCAATGAAGCTGAT     | 61 |
| VIT003 | 4 | 1st | TA         | GCAGTATCCAAACAGACCCTAA     | GCTTTGCTCTAAACAGCAACTT   | 59 |
| VIT017 | 4 | 1st | CGG        | GATCCGAATCCGAAACTGAA       | GTTACGAGCGAGGACGTTGT     | 59 |
| PIE002 | 4 | 1st | AG         | CTCCTCCATTTCCAATTCA        | TCGCTTGTGGTACATCTTGG     | 59 |
| WAG043 | 5 | 1st | AG         | GCCCACAGGCAAATAACAAC       | AACTCAGGCATGGGCTACAG     | 59 |
| POR014 | 5 | 1st | CT         | TTCCCACACATCAATTTTTCC      | TGAGACGTAAGAGCCAATCCT    | 59 |
| GOT065 | 5 | 1st | TT (comple | AATGCAGGCATGACCTCTCT       | TCAACCCGACTACGGAGAAC     | 59 |
| VIT023 | 5 | 1st | ATA        | AATGCGAACGACATGAACAA       | CTCTCGTCGGGAGACTCAACC    | 58 |
| POR039 | 5 | 1st | CCT        | CGAAGGAAAAGCCAAAGAA        | GCATTCAGTGCAACAAGTCC     | 59 |
| VIT021 | 5 | 1st | GA         | GCCGATCCTCGATCTGATAC       | CGCTGAGACCTTCTTCAACC     | 59 |
| POR024 | 6 | 1st | AG         | GCCCCGGATTTATTTCTCTG       | TGAGCCTCAACCAAACAAA      | 61 |
| POR034 | 6 | 1st | TTC        | TGCGTCTCAATCACTCTCTCT      | TCGATCCGTGAAAATCTGAA     | 61 |
| VIT028 | 6 | 1st | AG         | CGGAGTTGGTAGGCTCGAT        | CTCTCCCTCACTCTCCCTCA     | 59 |
| POR027 | 6 | 1st | GA         | AGGCCAGTTCATCCTTACA        | TGGTAATCCAACCTCAAGCTG    | 59 |
| PIE071 | 6 | 1st | TATTTT     | GTCGGCGATGAGAGGAAAG        | GGAGACATAGTTCCAACCTCAAGC | 58 |
| PIE137 | 7 | 1st | TC         | TCTCCTACCACCAAACAAGG       | CACTTCTCTAACCCCATCAGC    | 59 |
| VIT046 | 7 | 1st | CT         | ACATCACATGCTGGGGAAAT       | GCCAAGTGCTATCAGTGCAA     | 59 |
| FIR030 | 7 | 1st | AG         | GGACATATTTATCTAGGAGACGAGGT | ATGTCCCATAGCACAGAGCA     | 59 |
| PIE127 | 7 | 1st | ACACCA     | CTTTTGGGGATGATCTGTTG       | AGGATCCTTTGAATGGGAAG     | 59 |

|          |    |     |        |                            |                          |      |
|----------|----|-----|--------|----------------------------|--------------------------|------|
| POR025   | 7  | 1st | TC     | CACACAAACCCATATGATCTGAA    | TCTCTTTTCGATCCCTTCTGC    | 59   |
| VIT009   | 7  | 1st | AG     | CTGCTGCTGCTTCTTCCTCT       | GCGATCCGTAGGGTTAGGTC     | 59   |
| PIE011   | 8  | 2nd | AT     | CACCAAAAATTTCTTCGCTTATG    | TGAGCTACAAGGTTTACATCCCTA | 59   |
| PIE023   | 8  | 1st | AG     | GGTCTCTCTTATTTTCTCTTTCTTCG | TGTGAAGAAGAACAAGACCCTTT  | 59   |
| PIE054   | 8  | 2nd | GGTACG | AGCTAGCCCTGATCGATGTC       | CTGTGAAAGTGCCACTGGAG     | 59   |
| POR008   | 8  | 2nd | GTG    | AGGGGTCATCAGAGTTGGTG       | ATCCCTCAGTCTTCCCGAAC     | 59   |
| PIE101   | 8  | 1st | AT     | GCGACAGTCACAATTAAGCTAC     | CACCCAATTTTCAATCTGTG     | 59   |
| FIR046   | 8  | 1st | AT     | GTTTTGGGGCATTGTTGTGAC      | GGCTAGTCTAGTGTGGGGCTTT   | 59   |
| VIT013   | 8  | 1st | AAC    | GCCATGGCTTACACCACTTC       | ATCAACAGAGCGGGTTTGTG     | 59   |
| PIE090   | 8  | 2nd | CAGCAA | GAAACGTTCTGTTGGAGGA        | GGAAAGCTGGGAAACCAAG      | 59   |
| WAG014   | 8  | 2nd | GAA    | CCGAGCTTCAATTCTTCGAG       | TCTTATGCAGAAGTGGGATGG    | 59   |
| PIE249   | 8  | 2nd | AG     | GCTTTCACCTTTGAGAGAACTTG    | TGGCTATGAACTCAGCAATCC    | 59   |
| VIT031.1 | 8  | 1st | NA     | GCCACCCACCACTTTACAA        | TTGAAGCTTGGAGGAGATGAA    | 59   |
| VIT031.2 | 8  | 1st | CT     | GCCACCCACCACTTTACAA        | TTGAAGCTTGGAGGAGATGAA    | 59   |
| PIE155   | 8  | 1st | GA     | CCAGAAAATCAAGGCTGCTC       | ACAACCTCACTCATCACCACTGA  | 59   |
| VIT099   | 8  | 2nd | TA     | TGAGGTTGCTGATTCGTCAC       | TGAAAATCCAAAACCCTAACC    | 59   |
| PIE259   | 9  | 1st | AC     | TGGCTTTATGACACCTTTTCG      | CCTTTGGCATTTAGCATCAAA    | 59   |
| PIE059   | 9  | 1st | GAGCAC | GAGAGATGGAGCACGAGCA        | GGGTCAGGACCATCTTCTTGT    | 59   |
| FIR005   | 9  | 1st | CAA    | GGCAACAAGGCCTTAAATCA       | GGCAAGGGTTAAGGTGAACA     | 59   |
| PIE081   | 9  | 1st | GACAGG | GCAGAAGAACGGAAGAAGCA       | ATCCCGACTACCTCGAGCAT     | 59   |
| POR028   | 10 | 1st | AAT    | TCTTCAAACCCCTTCAACG        | TGAGGATGCCATAACCATCA     | 59   |
| ZQR96    | 10 | 1st | AG     | CCCAGTCACATCCACTACTGTCC    | GGTTGGGAAAAGGAGATCAGA    | 59   |
| PIE148   | 10 | 1st | GA     | GGTGTGAAGTTTTTGTTC         | ATCCTTTGGTGGGTGTGG       | 55.5 |
| ZQR11    | 10 | 1st | AG     | CCTTGAACCTCGAAGGTGTCCTT    | GTAGGTCAAACCATTTGGTTGACT | 59   |
| PIE186   | 10 | 1st | TAA    | CCATCACAAAACCTGCGCTATC     | CACGCTCATATACCCCAAATG    | 58   |
| PIE187   | 10 | 1st | ACA    | TTCTCAGCCCTTCGATCAAC       | TTTGTGGTGGTCTTTGTTGG     | 58   |
| PIE144   | 11 | 1st | CT     | TGCAAGGTGGGAACTTTGAT       | CGGCATTAAGAGCCTTCTC      | 59   |
| PIE257   | 11 | 1st | CT     | GCCAACGAGAGCTAAGTTGC       | GCAAGGTCAAGGTCAGGGTA     | 59   |
| WAG079   | 11 | 1st | CT     | CAAAACGACAAGGAAGGAGC       | CTAACACTGGCTGCTGTTGC     | 58   |
| FIR104   | 11 | 1st | GGT    | TTAACTCGGTTTTCGACTCA       | AGCACGTGACTCGACCTGTA     | 61   |
| PIE102   | 11 | 1st | AG     | ACCTTCCATGCTCAAAGATG       | GCTGGTGATACAAGTGTTTGG    | 59   |
| PIE202   | 11 | 1st | GAA    | GGGAAGAGAGAAAGAGATGGAAG    | CATTTCTGAAAAGCCCAATATG   | 59   |

|        |    |     |        |                          |                           |    |
|--------|----|-----|--------|--------------------------|---------------------------|----|
| PIE089 | 12 | 1st | TTAGGG | CGCCCTTAGACCAGGATTTT     | TTGAGTCTTGCTTGCCATTG      | 59 |
| GOT009 | 12 | 2nd | TC     | CACCTCACTAAGCAACCTGTCA   | TTTTGGAGGCGGAGATAATG      | 59 |
| VIT010 | 12 | 1st | TC     | CACGTGCATGTAAAGGTGCT     | CTGTGTCTGTGATGCGTGTTT     | 59 |
| PIE126 | 12 | 2nd | AATCCG | ACCGAAAGAAAAGCAGTGAG     | TAGTCGCGGAAGAAAGAGAG      | 59 |
| GOT032 | 12 | 2nd | AT     | TTACAGCCATTCCCTTTGCT     | AGACGAGGCTGAGCAAGTGT      | 59 |
| PIE196 | 12 | 2nd | GTG    | GTCTGCGTGTCTCAACTTCG     | CACAGCACTCTCACCACAGC      | 59 |
| VIT037 | 12 | 1st | TC     | GAAGCCACCAAAGCTCTGT      | GAGTGAAATGAAAAACCCAGA     | 59 |
| PIE236 | 12 | 1st | GAA    | TCAATCCCATCTTCCTGCTC     | TCTATGCGATTCCGCTTACC      | 59 |
| ZQR112 | 12 | 1st | AG     | TTCTTGCTTTGGTGCGCG       | GTGGTCAGAGACTCGGTAAGTATTC | 59 |
| POR020 | 12 | 2nd | GAT    | CAAATCCGCTCAACTTGTC      | ACCATCGTCTCCAACATCAA      | 59 |
| ZQR30  | 12 | 1st | AG     | TGCTCCGTCATAATCTTGCTCTGA | GCAATCCTATCATGCACATGCACAT | 59 |
| VIT050 | 12 | 2nd | ATTTTG | TGGTTCCTCAAGGTTGGT       | TGGTTCAAACACAAACCAG       | 59 |

#### AVERAGE

- 
- 1: Observed sizes, including the M13-tail
  - 2: Allelic richness based on a sample size of 75 diploid individuals
  - 3: Observed heterozygosity estimated from the number of heterozygotes.
  - 4: Expected heterozygosity (Nei, 1987).
  - 5: Effective-Number of Alleles (Crow & Kimura, 1964)
  - 6: n.s.: non-significant; \*:  $p < 0.05$
  - 7: Null-Alleles Frequency

*Quercus faginea**Quercus pyrenaica*

| Obs. Size <sup>1</sup> | AR <sup>2</sup> | Ho <sup>3</sup> | He <sup>4</sup> | EA <sup>5</sup> | Fis <sup>6</sup> | NAF <sup>7</sup> | Obs. Size <sup>1</sup> | AR <sup>2</sup> | Ho <sup>3</sup> | He <sup>4</sup> | EA <sup>5</sup> | Fis <sup>6</sup> | NAF <sup>7</sup> |
|------------------------|-----------------|-----------------|-----------------|-----------------|------------------|------------------|------------------------|-----------------|-----------------|-----------------|-----------------|------------------|------------------|
| 146-189                | 23.89           | 0.72            | 0.93            | 14.71           | 0.22 *           | 0.11             | 145-192                | 23.18           | 0.73            | 0.93            | 13.51           | 0.21 *           | 0.10             |
| 251-268                | 13.46           | 0.52            | 0.80            | 4.88            | 0.35 *           | 0.15             | 255-268                | 11.65           | 0.46            | 0.77            | 4.39            | 0.41 *           | 0.18             |
| 159-209                | 19.04           | 0.87            | 0.90            | 9.71            | 0.03 n.s.        |                  | 167-207                | 19.65           | 0.91            | 0.90            | 10.00           | -0.01 n.s.       |                  |
| 117-145                | 16.95           | 0.67            | 0.90            | 9.62            | 0.25 *           | 0.11             | 122-145                | 11.76           | 0.73            | 0.80            | 4.98            | 0.09 *           | 0.05             |
| 234-249                | 9.04            | 0.41            | 0.50            | 2.00            | 0.18 *           | 0.08             | 234-253                | 12.99           | 0.72            | 0.77            | 4.41            | 0.07 n.s.        | 0.03             |
| 169-195                | 5.566           | 0.55            | 0.60            | 2.48            | 0.07 n.s.        | 0.02             | 181-193                | 4.90            | 0.56            | 0.67            | 3.04            | 0.17 *           | 0.06             |
| 130-165                | 18.78           | 0.89            | 0.92            | 12.05           | 0.03 n.s.        | 0.03             | 127-162                | 16.69           | 0.79            | 0.86            | 7.35            | 0.09 *           | 0.06             |
| 186-198                | 4.95            | 0.45            | 0.53            | 2.11            | 0.15 n.s.        |                  | 186-203                | 4.71            | 0.59            | 0.65            | 2.83            | 0.09 n.s.        |                  |
| 201-254                | 26.19           | 0.86            | 0.94            | 15.38           | 0.08 *           | 0.04             | 200-251                | 23.14           | 0.70            | 0.94            | 15.87           | 0.25 *           | 0.12             |
| 118-162                | 12.05           | 0.56            | 0.62            | 2.60            | 0.10 n.s.        |                  | 110-191                | 19.93           | 0.84            | 0.85            | 6.80            | 0.02 n.s.        |                  |
| 234-269                | 16.74           | 0.76            | 0.89            | 8.85            | 0.15 *           | 0.06             | 224-263                | 21.35           | 0.70            | 0.84            | 6.13            | 0.17 *           | 0.08             |
| 216-250                | 16.13           | 0.49            | 0.75            | 4.03            | 0.34 *           | 0.12             | 220-258                | 18.07           | 0.83            | 0.91            | 10.75           | 0.09 *           | 0.03             |
| 218-245                | 13.45           | 0.64            | 0.81            | 5.35            | 0.21 *           | 0.11             | 218-247                | 11.29           | 0.57            | 0.72            | 3.60            | 0.21 *           | 0.10             |
| 196-221                | 8.49            | 0.24            | 0.26            | 1.36            | 0.10 n.s.        | 0.03             | 186-226                | 18.73           | 0.73            | 0.82            | 5.65            | 0.12 *           | 0.05             |
| 244-273                | 8.57            | 0.60            | 0.78            | 4.46            | 0.22 *           | 0.10             | 234-267                | 9.76            | 0.57            | 0.56            | 2.25            | -0.03 n.s.       | 0.04             |
| 137-161                | 15.62           | 0.66            | 0.75            | 3.92            | 0.11 *           | 0.04             | 132-161                | 15.66           | 0.75            | 0.87            | 7.75            | 0.14 *           | 0.06             |
| 289-336                | 12.26           | 0.69            | 0.76            | 4.10            | 0.09 n.s.        |                  | 282-333                | 12.11           | 0.55            | 0.64            | 2.74            | 0.12 n.s.        |                  |
| 72-147                 | 28.14           | 0.58            | 0.91            | 11.11           | 0.36 *           | 0.17             | 74-158                 | 30.35           | 0.94            | 0.94            | 16.95           | 0.00 n.s.        | 0.01             |
| 179-199                | 10.58           | 0.84            | 0.79            | 4.65            | 0.02 n.s.        |                  | 179-199                | 11.60           | 0.74            | 0.75            | 4.02            | 0.02 n.s.        |                  |
| 130-176                | 18.28           | 0.94            | 0.93            | 13.51           | -0.01 n.s.       |                  | 130-180                | 16.87           | 0.82            | 0.86            | 6.94            | 0.04 n.s.        |                  |
| 192-208                | 2.00            | 0.58            | 0.49            | 1.98            | -0.17 n.s.       |                  | 188-207                | 4.71            | 0.40            | 0.45            | 1.80            | 0.10 n.s.        |                  |
| 209-238                | 18.79           | 0.82            | 0.89            | 9.35            | 0.08 *           | 0.04             | 210-240                | 17.13           | 0.67            | 0.82            | 5.41            | 0.18 *           | 0.06             |
| 164-193                | 17.97           | 0.77            | 0.82            | 5.43            | 0.05 n.s.        |                  | 161-200                | 21.15           | 0.89            | 0.91            | 10.53           | 0.01 n.s.        |                  |

|         |       |      |      |       |            |      |         |       |      |      |       |            |      |
|---------|-------|------|------|-------|------------|------|---------|-------|------|------|-------|------------|------|
| 234-260 | 18.78 | 0.65 | 0.94 | 15.63 | 0.31 *     | 0.15 | 234-262 | 18.13 | 0.80 | 0.89 | 9.17  | 0.10 *     | 0.05 |
| 112-130 | 2.99  | 0.12 | 0.14 | 1.16  | 0.12 n.s.  |      | 112-130 | 4.71  | 0.61 | 0.55 | 2.20  | -0.12 n.s. |      |
| 170-223 | 30.75 | 0.81 | 0.94 | 15.63 | 0.13 *     | 0.07 | 162-225 | 28.61 | 0.64 | 0.95 | 18.52 | 0.33 *     | 0.15 |
| 222-244 | 4.35  | 0.45 | 0.44 | 1.78  | -0.02 n.s. |      | 223-229 | 2.77  | 0.41 | 0.41 | 1.68  | -0.02 n.s. |      |
| 145-178 | 13.29 | 0.66 | 0.87 | 7.52  | 0.23 *     | 0.10 | 138-168 | 12.86 | 0.44 | 0.83 | 5.78  | 0.47 *     | 0.21 |
| 202-233 | 12.46 | 0.61 | 0.75 | 3.97  | 0.18 *     | 0.07 | 204-230 | 9.75  | 0.93 | 0.87 | 7.69  | -0.07 n.s. | 0.00 |
| 179-211 | 6.78  | 0.54 | 0.65 | 2.87  | 0.17 *     | 0.07 | 181-210 | 6.77  | 0.56 | 0.67 | 3.02  | 0.16 *     | 0.04 |
| 136-178 | 15.77 | 0.81 | 0.88 | 8.20  | 0.08 *     | 0.03 | 144-186 | 16.33 | 0.80 | 0.86 | 7.35  | 0.08 *     | 0.02 |
| 143-193 | 12.49 | 0.83 | 0.86 | 7.35  | 0.04 n.s.  | 0.00 | 147-195 | 24.09 | 0.88 | 0.94 | 17.54 | 0.06 *     | 0.03 |
| 184-213 | 14.82 | 0.34 | 0.87 | 7.52  | 0.61 *     | 0.28 | 183-213 | 14.62 | 0.42 | 0.83 | 5.95  | 0.50 *     | 0.23 |
| 107-120 | 7.47  | 0.43 | 0.47 | 1.88  | 0.07 n.s.  |      | 107-118 | 6.48  | 0.48 | 0.50 | 2.00  | 0.03 n.s.  |      |
| 220-244 | 4.74  | 0.53 | 0.44 | 1.79  | -0.20 n.s. |      | 229-244 | 3.77  | 0.53 | 0.51 | 2.04  | -0.04 n.s. |      |
| 131-163 | 9.56  | 0.95 | 0.84 | 6.25  | -0.13 *    | 0.00 | 131-160 | 8.74  | 0.96 | 0.84 | 6.33  | -0.15 *    | 0.00 |
| 150-180 | 17.94 | 0.61 | 0.91 | 10.75 | 0.32 *     | 0.15 | 154-183 | 17.12 | 0.58 | 0.92 | 12.35 | 0.37 *     | 0.18 |
| 93-107  | 5.79  | 0.33 | 0.35 | 1.55  | 0.07 n.s.  |      | 93-110  | 6.53  | 0.32 | 0.33 | 1.50  | 0.05 n.s.  |      |
| 172-195 | 12.42 | 0.73 | 0.79 | 4.76  | 0.07 n.s.  |      | 172-188 | 12.39 | 0.76 | 0.78 | 4.57  | 0.02 n.s.  |      |
| 272-328 | 22.40 | 0.87 | 0.88 | 8.62  | 0.02 n.s.  | 0.02 | 273-328 | 22.34 | 0.80 | 0.93 | 15.15 | 0.14 *     | 0.07 |
| 159-191 | 19.15 | 0.78 | 0.86 | 7.14  | 0.09 *     | 0.03 | 162-191 | 18.38 | 0.74 | 0.89 | 9.01  | 0.17 *     | 0.07 |
| 248-269 | 4.78  | 0.51 | 0.58 | 2.39  | 0.12 n.s.  |      | 249-268 | 9.47  | 0.63 | 0.71 | 3.42  | 0.11 n.s.  |      |
| 129-154 | 12.59 | 0.48 | 0.69 | 3.27  | 0.31 *     | 0.11 | 129-153 | 12.50 | 0.55 | 0.77 | 4.41  | 0.28 *     | 0.12 |
| 174-214 | 5.75  | 0.67 | 0.58 | 2.40  | -0.15 n.s. | 0.00 | 185-214 | 7.93  | 0.58 | 0.73 | 3.66  | 0.20 *     | 0.08 |
| 155-192 | 16.75 | 0.91 | 0.90 | 9.71  | -0.02 n.s. |      | 153-190 | 19.36 | 0.88 | 0.87 | 7.81  | -0.01 n.s. |      |
| 169-212 | 20.10 | 0.78 | 0.89 | 9.35  | 0.12 *     | 0.06 | 174-200 | 15.59 | 0.81 | 0.86 | 6.99  | 0.06 n.s.  | 0.04 |
| 174-198 | 8.74  | 0.70 | 0.73 | 3.68  | 0.04 n.s.  | 0.00 | 174-200 | 8.53  | 0.58 | 0.72 | 3.58  | 0.20 *     | 0.10 |
| 150-172 | 15.53 | 0.42 | 0.81 | 5.24  | 0.49 *     | 0.22 | 150-178 | 15.72 | 0.69 | 0.87 | 7.46  | 0.20 *     | 0.09 |
| 117-131 | 5.57  | 0.65 | 0.62 | 2.60  | -0.06 n.s. | 0.00 | 117-139 | 8.70  | 0.45 | 0.62 | 2.60  | 0.27 *     | 0.12 |
| 235-256 | 14.50 | 0.67 | 0.90 | 10.10 | 0.26 *     | 0.12 | 237-267 | 14.79 | 0.68 | 0.88 | 8.20  | 0.23 *     | 0.10 |
| 340-356 | 8.47  | 0.48 | 0.51 | 2.04  | 0.06 n.s.  |      | 347-354 | 4.77  | 0.42 | 0.45 | 1.82  | 0.06 n.s.  |      |
| 184-199 | 5.78  | 0.65 | 0.72 | 3.55  | 0.09 n.s.  |      | 184-197 | 6.76  | 0.59 | 0.57 | 2.33  | -0.03 n.s. |      |
| 134-193 | 15.83 | 0.71 | 0.77 | 4.27  | 0.08 n.s.  |      | 134-195 | 15.97 | 0.78 | 0.78 | 4.55  | 0.00 n.s.  |      |
| 139-152 | 3.00  | 0.28 | 0.33 | 1.49  | 0.16 n.s.  |      | 139-152 | 3.95  | 0.34 | 0.40 | 1.67  | 0.15 n.s.  |      |

|         |       |      |      |       |            |      |         |       |      |      |       |            |      |
|---------|-------|------|------|-------|------------|------|---------|-------|------|------|-------|------------|------|
| 118-156 | 18.93 | 0.75 | 0.84 | 6.06  | 0.11 *     | 0.05 | 118-154 | 19.55 | 0.84 | 0.91 | 10.87 | 0.08 *     | 0.04 |
| 126-184 | 19.26 | 0.83 | 0.85 | 6.58  | 0.02 n.s.  | 0.01 | 123-182 | 17.52 | 0.81 | 0.89 | 9.35  | 0.09 *     | 0.05 |
| 234-265 | 19.68 | 0.63 | 0.89 | 9.09  | 0.29 *     | 0.13 | 236-267 | 19.24 | 0.91 | 0.91 | 10.87 | 0.00 n.s.  | 0.01 |
| 188-192 | 2.78  | 0.16 | 0.19 | 1.23  | 0.16 n.s.  |      | 190-198 | 4.84  | 0.22 | 0.23 | 1.31  | 0.05 n.s.  |      |
| 248-277 | 9.05  | 0.17 | 0.31 | 1.45  | 0.45 *     | 0.13 | 240-277 | 10.94 | 0.43 | 0.62 | 2.60  | 0.30 *     | 0.12 |
| 147-158 | 4.73  | 0.18 | 0.19 | 1.24  | 0.05 n.s.  |      | 151-154 | 2.00  | 0.12 | 0.11 | 1.12  | -0.06 n.s. |      |
| 154-174 | 9.56  | 0.52 | 0.81 | 5.21  | 0.36 *     | 0.16 | 154-178 | 10.53 | 0.59 | 0.83 | 5.75  | 0.29 *     | 0.13 |
| 211-241 | 19.03 | 0.58 | 0.93 | 14.29 | 0.38 *     | 0.18 | 210-239 | 20.92 | 0.68 | 0.92 | 12.66 | 0.26 *     | 0.12 |
| 151-188 | 6.77  | 0.55 | 0.63 | 2.70  | 0.12 n.s.  | 0.02 | 151-166 | 5.00  | 0.43 | 0.74 | 3.82  | 0.42 *     | 0.18 |
| 198-209 | 3.78  | 0.28 | 0.44 | 1.79  | 0.37 *     | 0.15 | 198-205 | 3.00  | 0.29 | 0.53 | 2.13  | 0.46 *     | 0.18 |
| 295-324 | 14.02 | 0.70 | 0.72 | 3.58  | 0.03 n.s.  | 0.00 | 300-327 | 13.54 | 0.82 | 0.89 | 9.17  | 0.08 *     | 0.04 |
| 282-301 | 10.42 | 0.65 | 0.74 | 3.79  | 0.12 *     | 0.05 | 281-299 | 11.16 | 0.64 | 0.70 | 3.34  | 0.08 n.s.  | 0.03 |
| 93-103  | 7.99  | 0.55 | 0.81 | 5.26  | 0.32 *     | 0.15 | 97-104  | 4.94  | 0.13 | 0.55 | 2.24  | 0.76 *     | 0.27 |
| 104-114 | 6.98  | 0.54 | 0.78 | 4.50  | 0.30 *     | 0.13 | 106-121 | 6.71  | 0.65 | 0.74 | 3.82  | 0.11 *     | 0.04 |
| 245-281 | 16.98 | 0.77 | 0.87 | 7.63  | 0.11 *     | 0.04 | 246-283 | 20.22 | 0.84 | 0.87 | 7.46  | 0.03 n.s.  | 0.01 |
| 134-165 | 15.21 | 0.83 | 0.86 | 6.94  | 0.03 n.s.  |      | 138-167 | 14.13 | 0.81 | 0.85 | 6.45  | 0.04 n.s.  |      |
| 135-162 | 11.56 | 0.70 | 0.87 | 7.58  | 0.19 *     | 0.08 | 135-162 | 8.76  | 0.44 | 0.83 | 6.02  | 0.48 *     | 0.22 |
| 164-189 | 5.78  | 0.65 | 0.66 | 2.97  | 0.02 n.s.  |      | 164-195 | 9.72  | 0.78 | 0.75 | 4.03  | -0.03 n.s. |      |
| 161-184 | 6.95  | 0.83 | 0.73 | 3.75  | -0.13 *    | 0.00 | 161-178 | 7.94  | 0.72 | 0.70 | 3.34  | -0.02 n.s. | 0.01 |
| 175-200 | 5.69  | 0.22 | 0.24 | 1.32  | 0.11 n.s.  |      | 180-200 | 5.76  | 0.46 | 0.52 | 2.09  | 0.12 n.s.  |      |
| 118-139 | 15.45 | 0.56 | 0.89 | 8.85  | 0.37 *     | 0.17 | 117-140 | 14.51 | 0.42 | 0.90 | 10.10 | 0.53 *     | 0.25 |
| 148-197 | 18.31 | 0.87 | 0.91 | 11.63 | 0.05 n.s.  |      | 156-205 | 18.08 | 0.78 | 0.83 | 5.85  | 0.05 n.s.  |      |
| 182-217 | 20.30 | 0.88 | 0.93 | 13.33 | 0.04 n.s.  |      | 184-217 | 23.33 | 0.90 | 0.93 | 14.93 | 0.04 n.s.  |      |
| 264-297 | 15.41 | 0.34 | 0.76 | 4.18  | 0.56 *     | 0.24 | 264-295 | 16.54 | 0.50 | 0.84 | 6.41  | 0.41 *     | 0.19 |
| 185-211 | 13.79 | 0.77 | 0.87 | 7.41  | 0.11 *     | 0.03 | 185-214 | 18.86 | 0.87 | 0.93 | 14.29 | 0.06 *     | 0.03 |
| 213-229 | 5.82  | 0.68 | 0.70 | 3.37  | 0.03 n.s.  |      | 217-229 | 4.93  | 0.65 | 0.61 | 2.54  | -0.07 n.s. |      |
| 235-271 | 19.61 | 0.94 | 0.93 | 13.89 | -0.01 n.s. |      | 235-269 | 19.75 | 0.87 | 0.92 | 12.99 | 0.06 n.s.  |      |
| 163-191 | 12.52 | 0.93 | 0.87 | 7.94  | -0.06 n.s. |      | 167-191 | 11.52 | 0.93 | 0.87 | 7.81  | -0.07 n.s. |      |
| 302-338 | 18.56 | 0.78 | 0.89 | 8.93  | 0.12 *     | 0.04 | 301-339 | 19.48 | 0.79 | 0.75 | 4.03  | -0.05 n.s. | 0.00 |
| 216-250 | 12.43 | 0.87 | 0.84 | 6.41  | -0.03 n.s. |      | 216-247 | 10.28 | 0.76 | 0.77 | 4.35  | 0.01 n.s.  |      |
| 162-187 | 12.68 | 0.84 | 0.82 | 5.68  | -0.02 n.s. |      | 152-183 | 12.43 | 0.51 | 0.64 | 2.77  | 0.10 n.s.  |      |
| 126-128 | 2.97  | 0.96 | 0.51 | 2.05  | -0.88 *    | 0.00 | 126-131 | 3.86  | 0.08 | 0.24 | 1.32  | 0.67 *     | 0.17 |

|         |       |      |      |       |            |      |         |       |      |      |       |            |      |
|---------|-------|------|------|-------|------------|------|---------|-------|------|------|-------|------------|------|
| 257-272 | 6.78  | 0.52 | 0.75 | 3.92  | 0.20 *     | 0.11 | 263-272 | 7.70  | 0.52 | 0.63 | 2.70  | 0.18 *     | 0.09 |
| 236-278 | 18.90 | 0.52 | 0.72 | 3.56  | 0.28 *     | 0.11 | 230-274 | 17.60 | 0.72 | 0.86 | 7.35  | 0.17 *     | 0.07 |
| 140-160 | 8.98  | 0.55 | 0.77 | 4.42  | 0.29 *     | 0.11 | 140-162 | 9.76  | 0.70 | 0.75 | 4.03  | 0.07 n.s.  | 0.00 |
| 252-269 | 5.78  | 0.41 | 0.47 | 1.87  | 0.12 n.s.  |      | 253-269 | 5.76  | 0.74 | 0.73 | 3.65  | -0.02 n.s. |      |
| 143-178 | 11.86 | 0.58 | 0.70 | 3.36  | 0.06 n.s.  | 0.01 | 149-183 | 18.00 | 0.78 | 0.91 | 11.24 | 0.14 *     | 0.07 |
| 221-239 | 5.95  | 0.65 | 0.62 | 2.63  | -0.05 n.s. |      | 221-239 | 8.00  | 0.84 | 0.80 | 4.88  | -0.05 n.s. |      |
| 109-144 | 12.60 | 0.60 | 0.88 | 8.20  | 0.31 *     | 0.14 | 110-145 | 15.16 | 0.85 | 0.84 | 6.33  | -0.01 n.s. | 0.02 |
| 213-236 | 7.74  | 0.82 | 0.77 | 4.37  | -0.06 n.s. |      | 213-235 | 6.52  | 0.58 | 0.66 | 2.92  | 0.12 n.s.  |      |
| 95-118  | 9.87  | 0.72 | 0.73 | 3.68  | 0.01 n.s.  |      | 103-112 | 5.62  | 0.50 | 0.52 | 2.10  | 0.05 n.s.  |      |
| 112-140 | 8.72  | 0.78 | 0.80 | 5.10  | 0.03 n.s.  |      | 112-137 | 8.75  | 0.72 | 0.78 | 4.52  | 0.08 n.s.  |      |
| 190-257 | 24.07 | 0.86 | 0.93 | 13.89 | 0.08 *     | 0.03 | 190-262 | 25.53 | 0.75 | 0.93 | 15.15 | 0.20 *     | 0.10 |
| 136-167 | 4.78  | 0.76 | 0.68 | 3.12  | -0.12 n.s. |      | 147-167 | 5.00  | 0.34 | 0.34 | 1.52  | 0.00 n.s.  |      |
|         | 12.40 | 0.64 | 0.73 | 5.89  |            |      |         | 12.85 | 0.65 | 0.74 | 6.23  |            |      |

---
