# Supplementary material
Source: PubMed Central journal article supplement (PMC4359976)
Supplement: hdy2014113x4.pdf [file hdy2014113x4.pdf]

**Table S4-1:** Number of alleles, genetic diversity and demographic signatures in the two Mediterranean white oaks. Analyses were carried out separately for datasets with all neutral markers, and for datasets with 2 bp and 3-6 bp EST-SSRs. *K*, number of alleles and its standard deviation (SD); *He* (SD), gene diversity;  $T_2$ , bottleneck statistic under the two-phase (TPM) model with different proportions of strict stepwise mutations. Significant values of the Wilcoxon signed rank tests are underlined.

|                     | SSRs <sup>a</sup> | <i>K</i>       | <i>He</i>     | TPM 90% |                                 |                                     | TPM 70% |                                 |                                     |
|---------------------|-------------------|----------------|---------------|---------|---------------------------------|-------------------------------------|---------|---------------------------------|-------------------------------------|
|                     |                   |                |               | $T_2$   | <i>P</i><br>( <i>He</i> excess) | <i>P</i><br>( <i>He</i> deficiency) | $T_2$   | <i>P</i><br>( <i>He</i> excess) | <i>P</i><br>( <i>He</i> deficiency) |
| <i>Q. faginea</i>   | All               | 11.013 (5.398) | 0.722 (0.179) | -14.991 | 1,000                           | <u>0,000</u>                        | -8.091  | 0.999                           | <u>0.001</u>                        |
| <i>Q. pyrenaica</i> | All               | 11.089 (5.592) | 0.733 (0.169) | -12.453 | 1,000                           | <u>0,000</u>                        | -6.137  | 0.998                           | <u>0.002</u>                        |
| <i>Q. faginea</i>   | 2 bp              | 13.625 (4.971) | 0.796 (0.118) | -11.443 | 1,000                           | <u>0,000</u>                        | -6.441  | 0.985                           | <u>0.015</u>                        |
| <i>Q. pyrenaica</i> | 2 bp              | 14.174 (4.986) | 0.806 (0.116) | -11.196 | 1,000                           | <u>0,000</u>                        | -5.985  | 0.999                           | <u>0.001</u>                        |
| <i>Q. faginea</i>   | 3-6 bp            | 6.909 (2.951)  | 0.609 (0.192) | -9.241  | 1,000                           | <u>0,000</u>                        | -4.972  | 0.995                           | <u>0.005</u>                        |
| <i>Q. pyrenaica</i> | 3-6 bp            | 6.788 (2.913)  | 0.631 (0.180) | -6.175  | 0.997                           | <u>0.002</u>                        | -2.424  | 0.825                           | 0.178                               |

<sup>a</sup>: SSRs showing evidence of selection in the multilocus scan tests were discarded from all datasets.

**Table S4-2:** Estimates of the population parameter  $\theta$  and of the imbalance index  $\beta$ , based on data from the two hybridizing oak species. The analyses were carried out with all neutral markers and separately for di- and tri/hexa-nucleotide repeat motifs SSRs.  $\theta_V$  and  $\theta_P$ , the  $\theta$  estimates based on the genetic variance (V, average variance in the number of repeats) and in the homozygosity ( $P_0$ , average homozygosity);  $\beta$ , imbalance index;  $\ln\beta$ , estimator of the imbalance index  $\beta$ .

|                | <i>Quercus faginea</i> |               |                     | <i>Quercus pyrenaica</i> |               |                     |
|----------------|------------------------|---------------|---------------------|--------------------------|---------------|---------------------|
|                | All                    | Di-nucleotide | Tri/Hexa-nucleotide | All                      | Di-nucleotide | Tri/Hexa-nucleotide |
| $\theta_{V=V}$ | 9.01                   | 13.97         | 2.09                | 9.97                     | 15.49         | 2.28                |
| $P_0$          | 0.27                   | 0.20          | 0.36                | 0.25                     | 0.20          | 0.32                |
| $\theta_P$     | 17.42                  | 24.00         | 8.25                | 20.21                    | 26.33         | 11.67               |
| $\beta$        | 0.41                   | 0.54          | 0.29                | 0.38                     | 0.55          | 0.22                |
| $\ln\beta$     | -0.88                  | -0.61         | -1.24               | -0.98                    | -0.60         | -1.49               |
