# Supplementary material
Source: PubMed Central journal article supplement (PMC4359976)

**Figure S7-1:** Significant LD estimates, after Yates correction, obtained among markers from different LGs that contain outliers clusters. The bold squares highlight the comparisons among the markers within the clusters. Outliers from each cluster are indicated to the left and bottom from each figure. See Supplementary File 6 legend for other plots details.

A – *Quercus faginea*

LG2-LG8

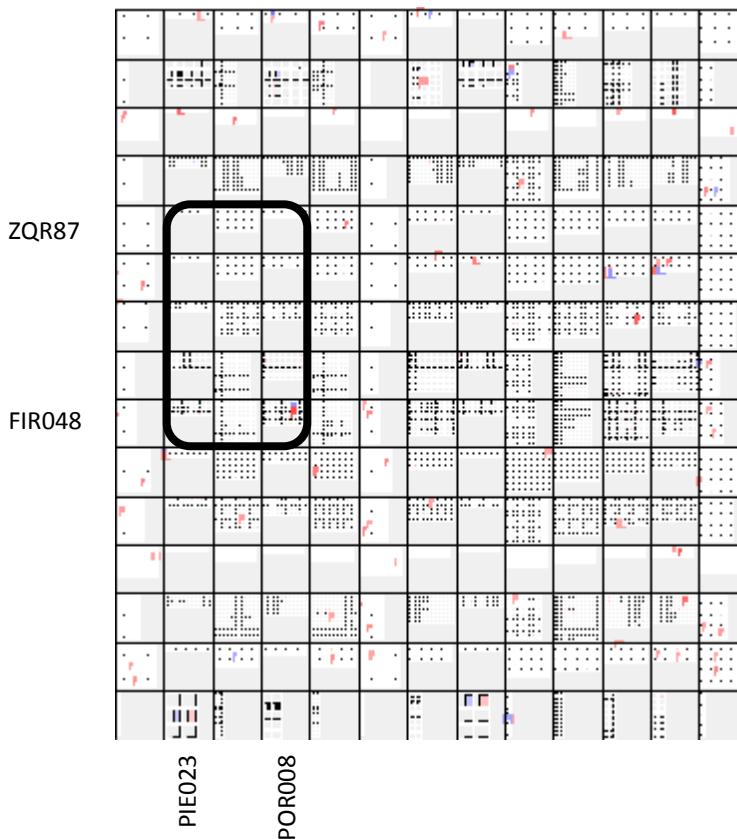

LG2-LG12

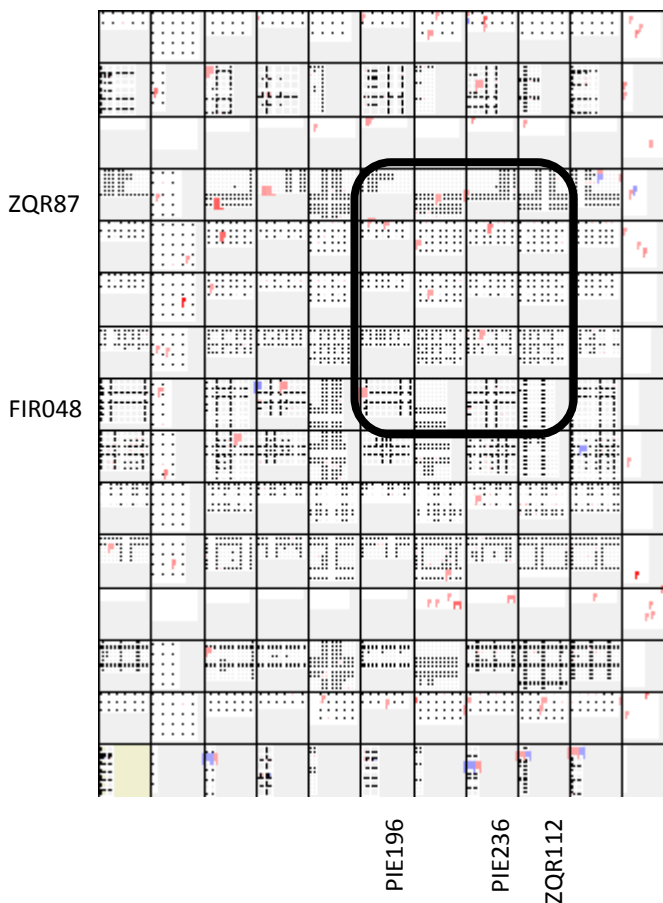

Figure S7-1: (cont.)

LG8-LG12

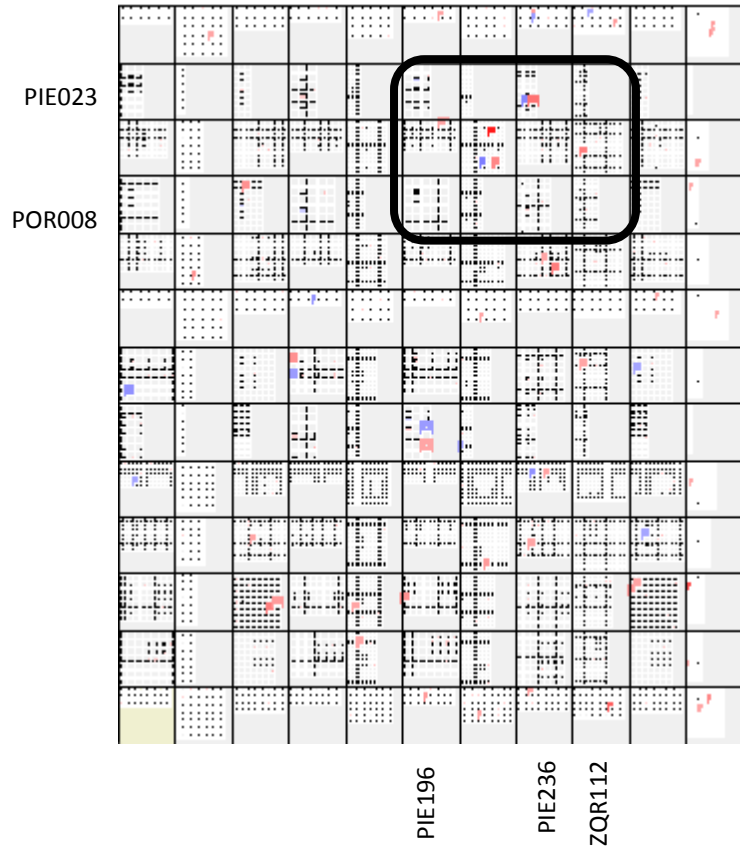

Figure S7-1: (cont.)

B – *Quercus pyrenaica*

LG2-LG8

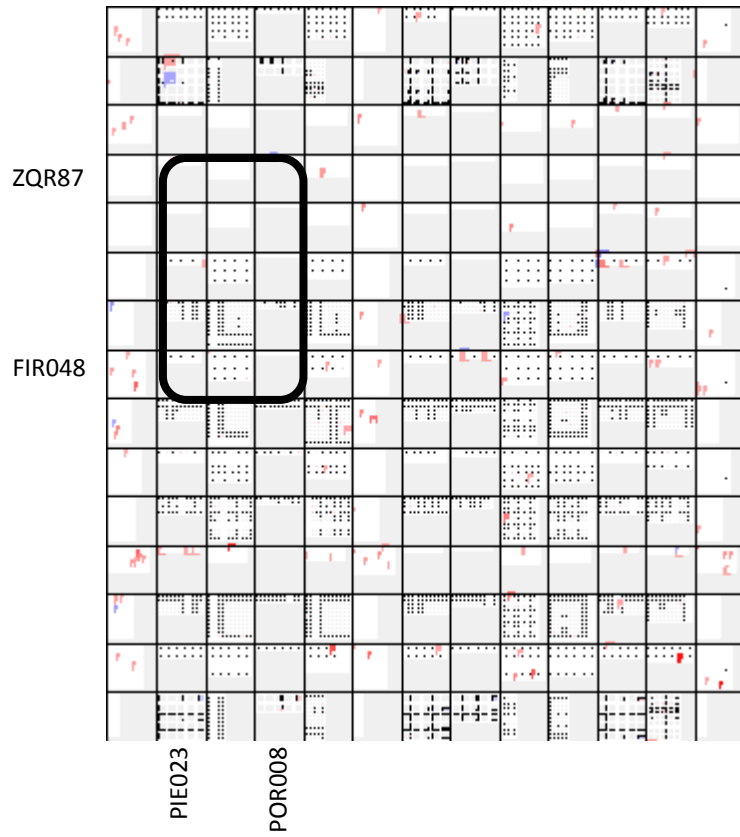

LG2-LG12

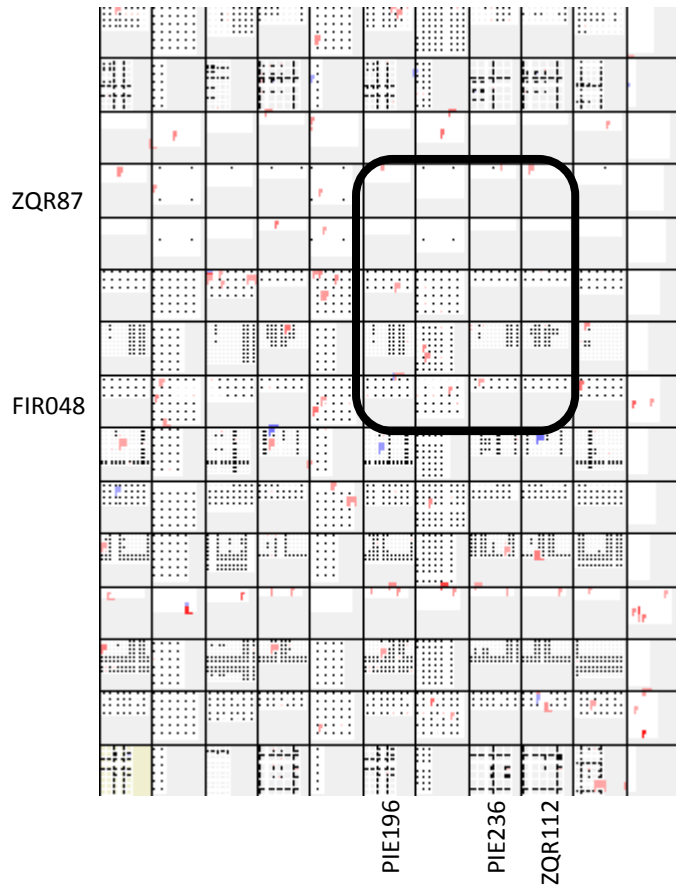

Figure S7-1: (cont.)

LG8-LG12

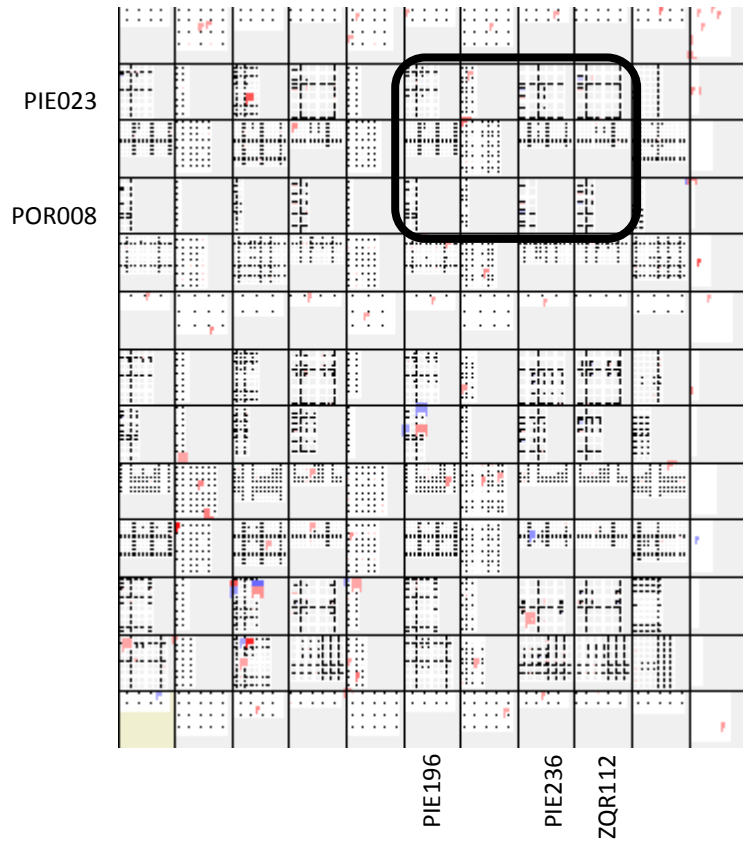

**Figure S7-2:** Significant LD estimates, without Yates correction, obtained among markers from different LGs that contain outliers clusters. The bold squares highlight the comparisons among the markers within the clusters. Outliers from each cluster are indicated to the left and bottom from each figure. See Supplementary File 6 legend for other plots details.

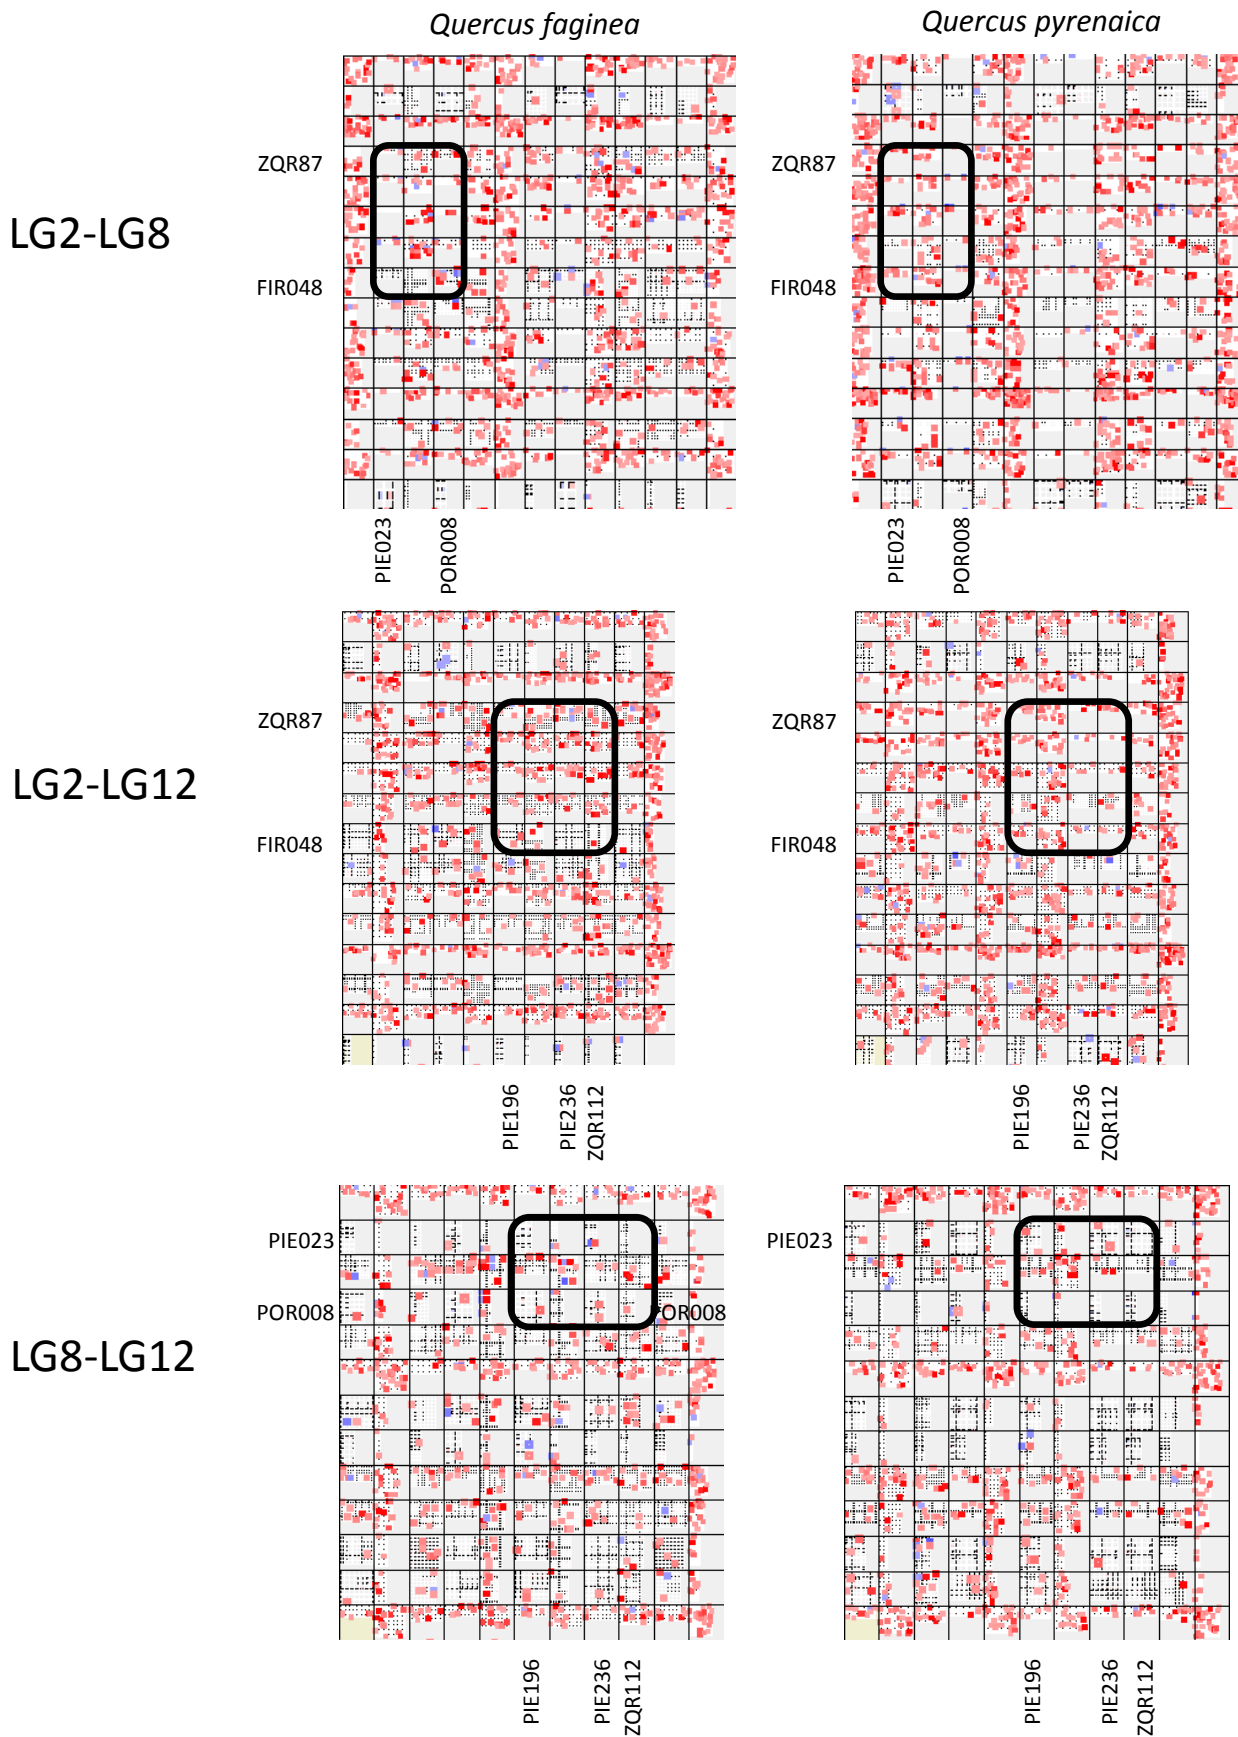

Supplement: hdy2014113x7.pdf [file hdy2014113x7.pdf]
